# Supplementary material for: Imidazole-based fluorescent probes: concomitant effects of N1 substitution and lone pair on selective recognition of picric acid
Source: Royal Society of Chemistry journal article supplement (doi:10.1039/d2nj06079e), 2023-01-01
Supplement: d2nj06079e1.pdf [file d2nj06079e1.pdf]

## Supporting Information

### Imidazole-based fluorescent probes: Concomitant effects of N1 substitution and lone pair on selective recognition of Picric Acid

Sandhya Rani Nayak<sup>1</sup>, Sabita Patel<sup>1</sup> and Sivakumar Vaidyanathan<sup>2\*</sup>.

<sup>1</sup>Department of Chemistry, National Institute of Technology Rourkela,

Rourkela-769 008, Odisha, India.

<sup>2</sup>Department of Chemistry, Indian Institute of Technology, Hyderabad

Kandi, Sangareddy-502285, Telangana, India.

#### Contents:

#### SI1. NMR (<sup>1</sup>H) spectra of Imidazole derivatives.

**Fig. SI1.** <sup>1</sup>H NMR spectrum of 2-NTPI-1

**Fig. SI1(i).** <sup>13</sup>C NMR spectrum of 2-NTPI-1

**Fig. SI2.** <sup>1</sup>H NMR spectrum of 2-NTPI-2

**Fig. SI2(i).** <sup>13</sup>C NMR spectrum of 2-NTPI-2

**Fig. SI3.** <sup>1</sup>H NMR spectrum of 2-NTPI-3

**Fig. SI3(i).** <sup>13</sup>C NMR spectrum of 2-NTPI-3

**Fig. SI4.** <sup>1</sup>H NMR spectrum of 2-NTPI-4

**Fig. SI4(i).** <sup>13</sup>C NMR spectrum of 2-NTPI-4

**Fig. SI5.** <sup>1</sup>H NMR spectrum of 2-NTPI-5

**Fig. SI5(i).** <sup>13</sup>C NMR spectrum of 2-NTPI-5

#### SI2. Mass spectra of Imidazole derivatives.

**Fig. SI6.** Mass spectrum of the 2-NTPI-1

**Fig. SI7.** Mass spectrum of the 2-NTPI-2

**Fig. SI8.** Mass spectrum of the 2-NTPI-3

**Fig. SI9.** Mass spectrum of the 2-NTPI-4

**Fig. SI10.** Mass spectrum of the 2-NTPI-5

**SI3.**  $^1\text{H-NMR}$  spectra with PA (0, 0.5, 1.0 equiv) in  $\text{CDCl}_3$  and DMSO.

**SI4.** Change in the fluorescence upon the addition of different quenchers.

**Table ST1:** The Comparison of our luminophores with other reported PA sensors.

**SI5** DFT analysis of luminophores with and without PA.

**SI6.** Lifetime of the respective luminophores in presence and absence of PA.

**Table ST2:** Lifetime of the respective luminophores.

**Table ST3:** Computed Vertical Transitions and Their Oscillator Strengths and Configurations

**Table ST4:** FMO orbitals of the luminophores

## **Experimental section**

### **Materials:**

All the reaction carried out under nitrogen atmosphere. Commercially available reagents (sigma aldrich) were used as purchased without any further purification. All the reaction were monitored by thin-layer chromatography (TLC) with silica gel 60 F<sub>254</sub> Aluminium plates (Merck). Column chromatography was carried out using silica gel (Sigma-Aldrich).

### **General information for Measurements:**

$^1\text{H}$  NMR and  $^{13}\text{C}$  NMR spectra were measured using an AV 400 Avance-III 400 MHz FT-NMR spectrometer (Bruker Biospin International, Switzerland) with tetramethylsilane (TMS) as the internal standard reference. The absorption and photoluminescence (PL) excitation and emission spectra of the synthesized luminophores were measured using a SHIMADZU UV-2450 spectrophotometer and a HORIBAFLUOROMAX – 4P spectrophotometer, respectively. Thin film making with the help of spin coating instrument (Holmarc Spin coater, Model No. HO-TH-OSC) by stages were at 1000 rpm (60 sec). The prepared thin film were kept under UV drying for 10 sec to get excess solvent evaporation. The absolute fluorescence quantum yield was measured with

Edinburgh Spectrofluorometer, FS5 with Integrating Sphere SC-30. The electrochemical properties of the fluorophores were measured by using Cyclic voltammetry (CV) experiments were performed in dimethyl formamide (DMF) solution containing 0.1 M tert-butyl ammonium perchlorate ( $\text{Bu}_4\text{NClO}_4$ ) using as the supporting electrolyte, and the scan rate was continued at  $100 \text{ mV s}^{-1}$  using an AUTOLAB 302N Modular potentiostat at room temperature. The working (glass-carbon rod), auxiliary (counter, Pt wire) and reference (Ag/AgCl wire) electrode were used for CV analysis. The CIE color chromaticity coordinates of the fluorophores were calculated from the emission spectral values by using MATLAB software.

#### **Detection Measurement of Nitroaromatic compound:**

For quantitative measurement, the emission measurements were performed in increasing the different concentrations of PA in THF ( $1 \times 10^{-5} \text{ M}$ ). Subsequent addition of  $0 \mu\text{L}$  to  $120 \mu\text{L}$  in the respective fluorophores ( $1 \times 10^{-5} \text{ M}$ ) of the solution. By subsequent addition of picric acid the absolute decreasing of the intensity was observed as compared to other nitroaromatics compound. We also check the response time within 10sec adding the concentration of PA the quenching of emission happens which results that even if with the low concentration of PA the fluorophores perfectly responses.

#### **NMR Spectra of all luminophores:**



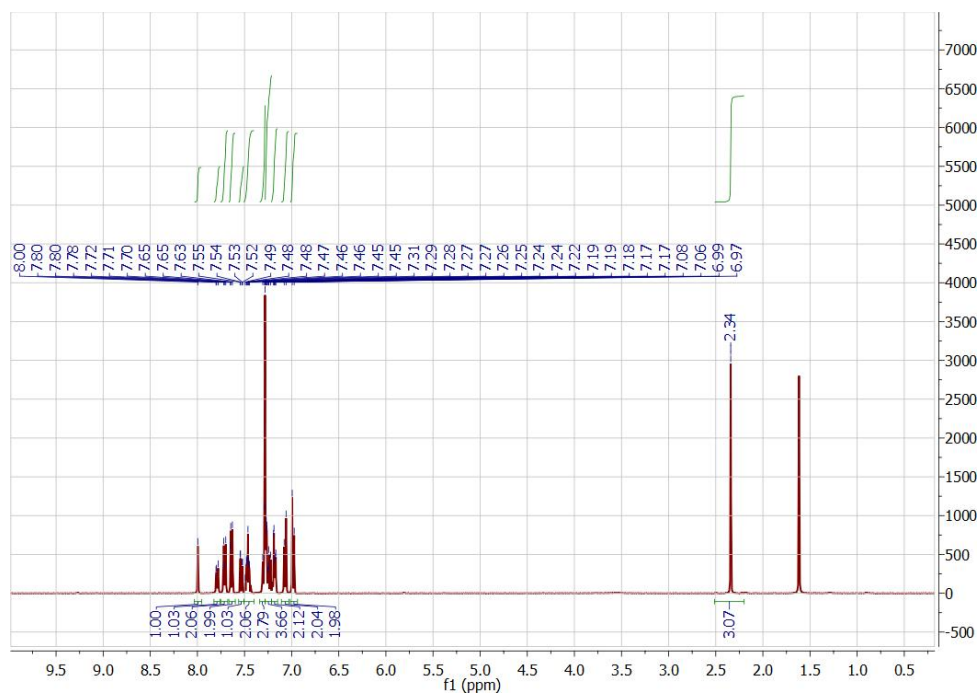

**Fig. S12.**  $^1\text{H}$  NMR spectrum of 2-NTPI-2.

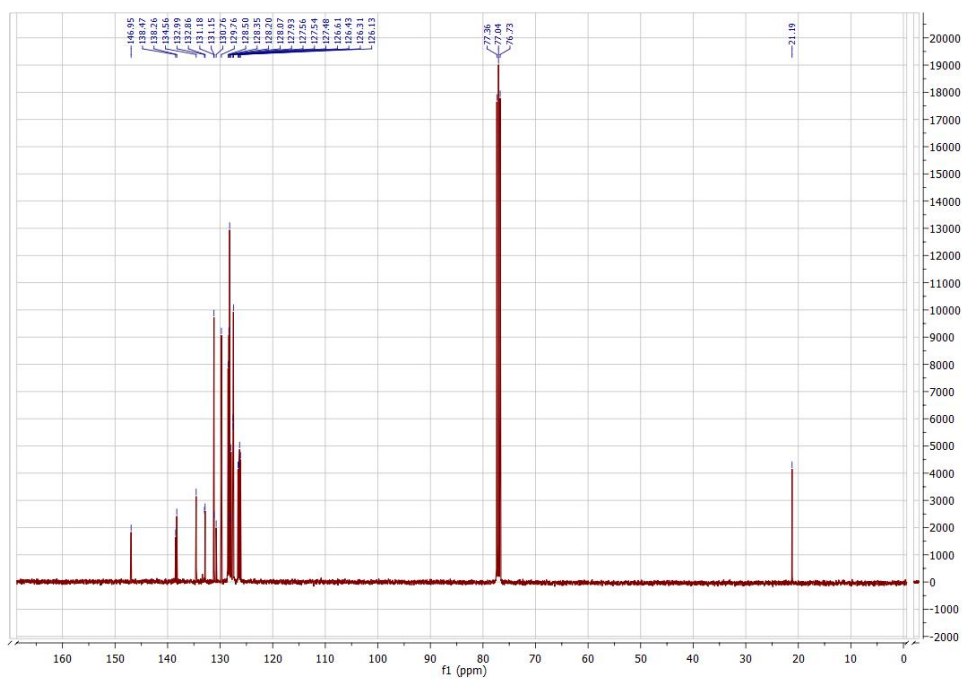

**Fig. S12(i).**  $^{13}\text{C}$  NMR spectrum of 2-NTPI-2.

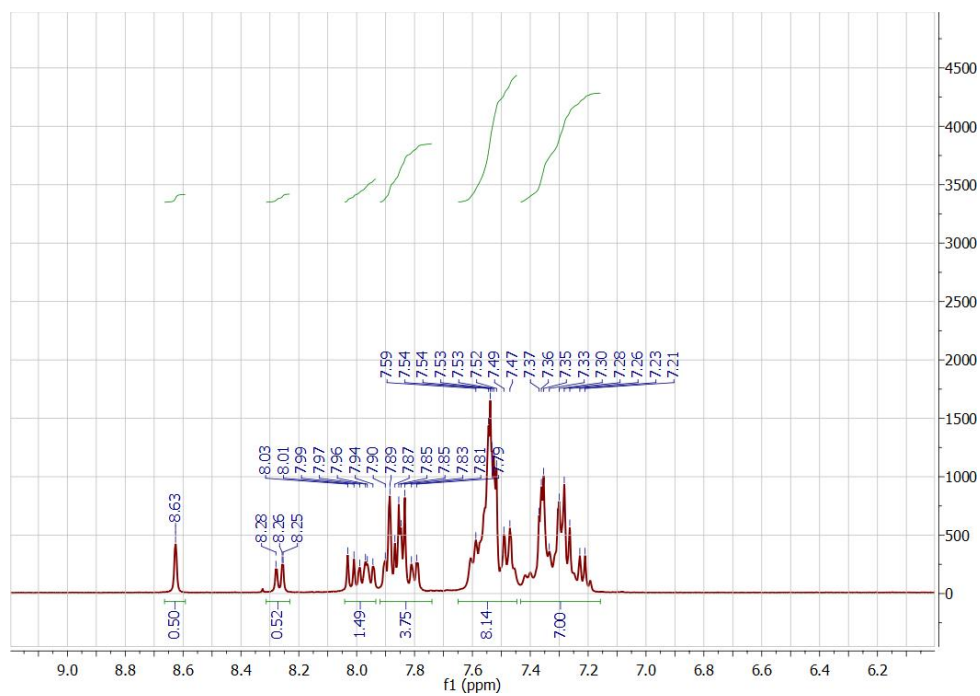

**Fig. S13.**  $^1\text{H}$  NMR spectrum of 2-NTPI-3.

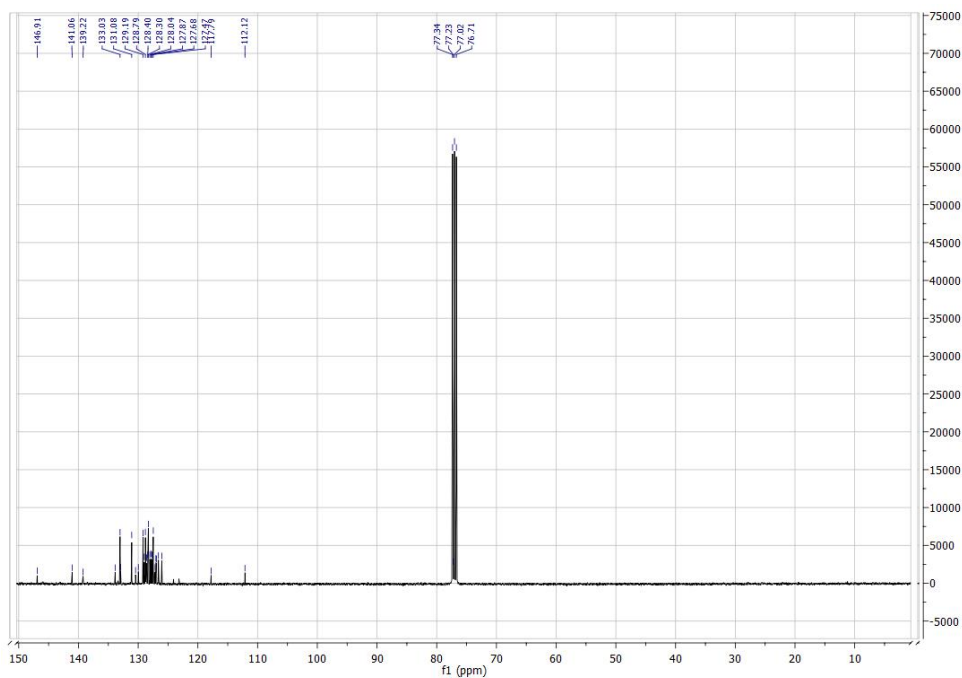

**Fig. S13(i).**  $^{13}\text{C}$  NMR spectrum of 2-NTPI-3.

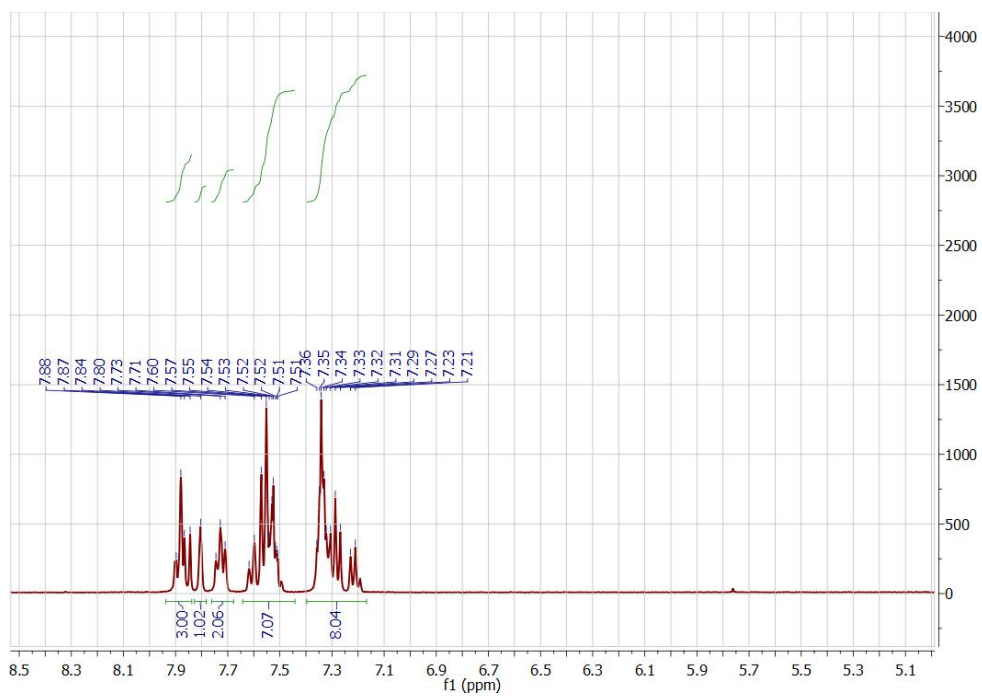

**Fig. S14.**  $^1\text{H}$  NMR spectrum of 2-NTPI-4.

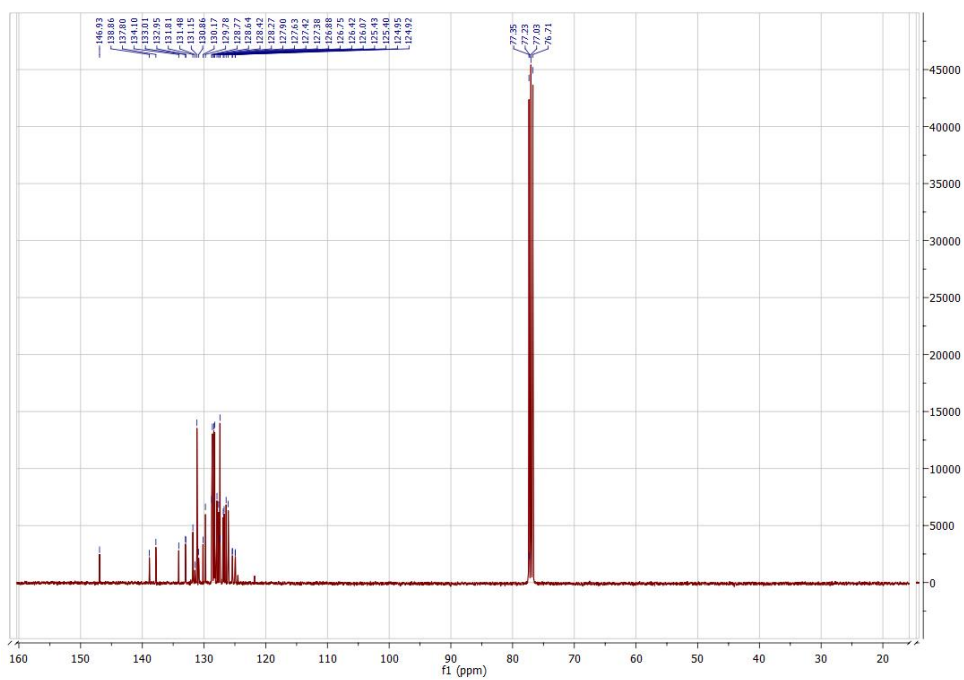

**Fig. S14(i).**  $^{13}\text{C}$  NMR spectrum of 2-NTPI-4.

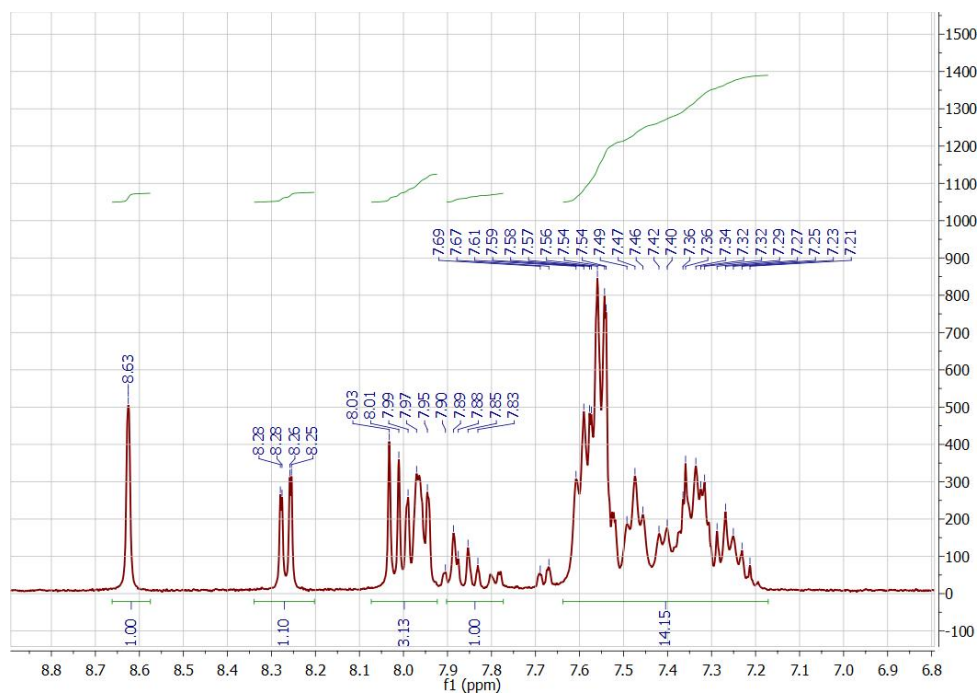

**Fig. SI5.**  $^1\text{H}$  NMR spectrum of 2-NTPI-5.

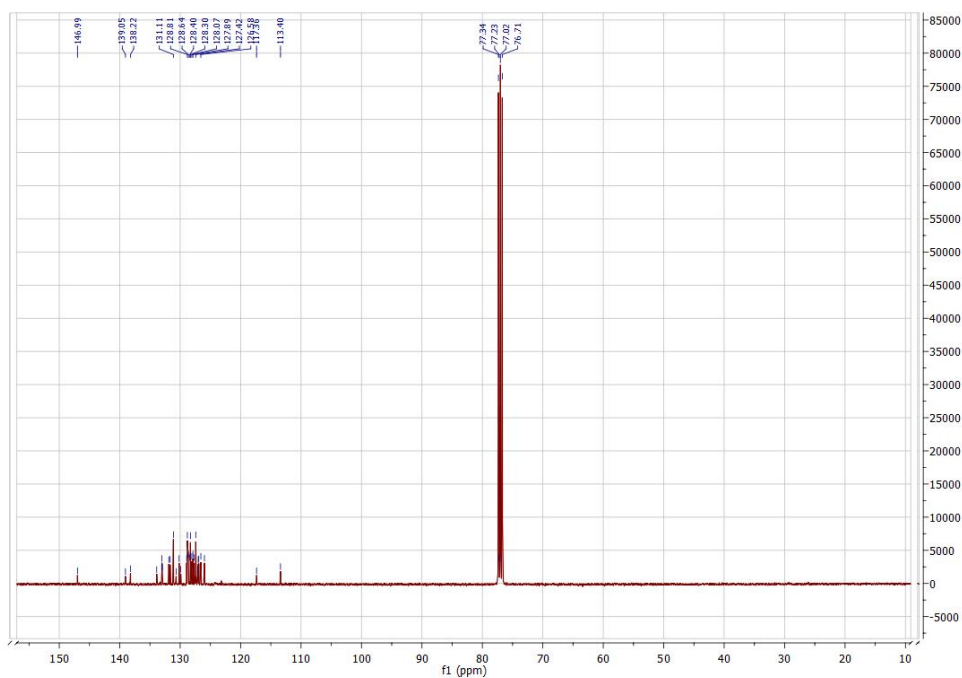

**Fig. SI5(i).**  $^{13}\text{C}$  NMR spectrum of 2-NTPI-5.

**Mass Spectra of all the luminophores.**



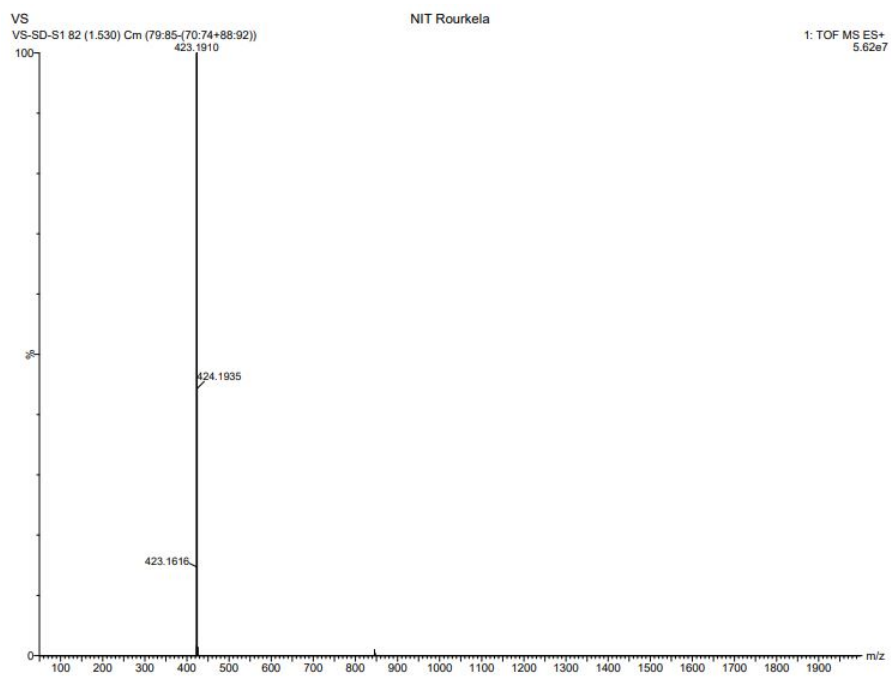

**Fig. S16.** Mass spectrum of the 2-NTPI-1.

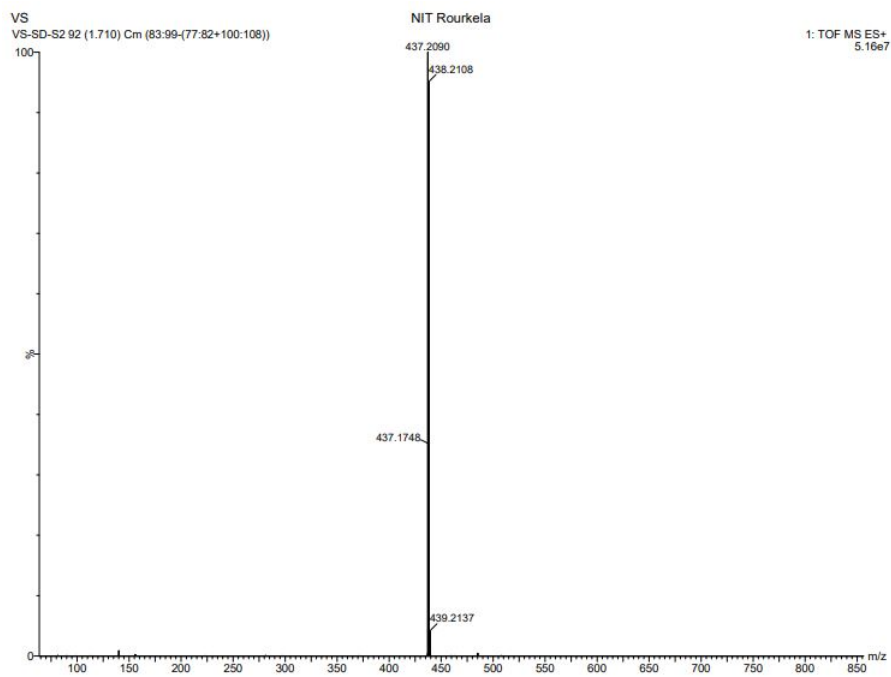

**Fig. S17.** Mass spectrum of the 2-NTPI-2.

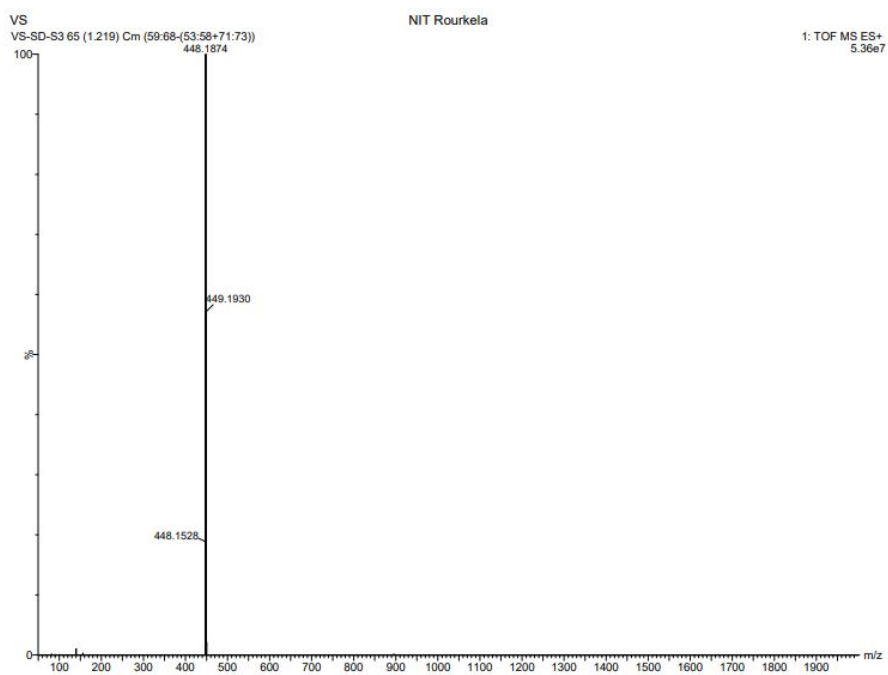

**Fig. S18.** Mass spectrum of the 2-NTPI-3

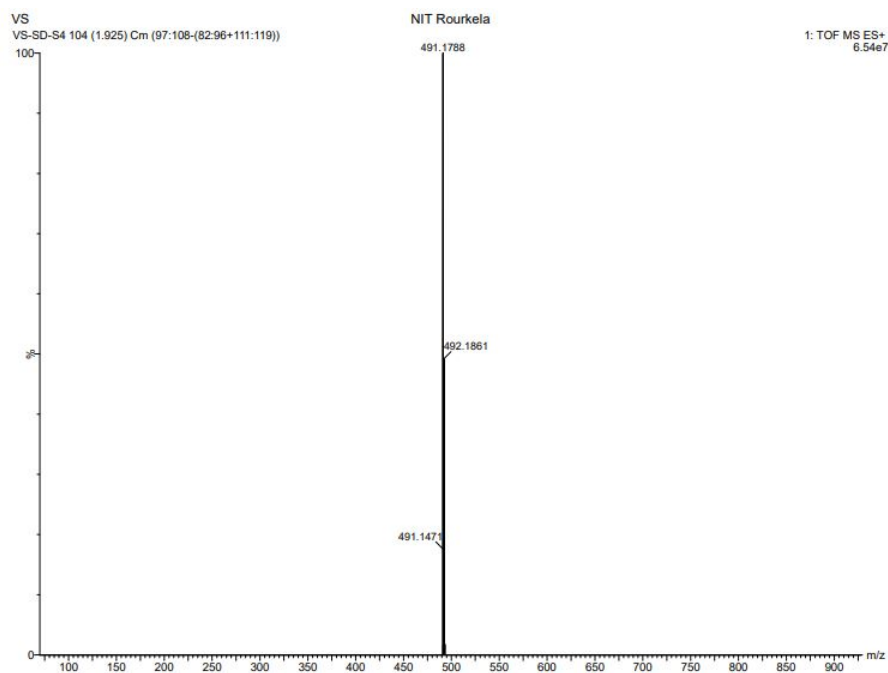

**Fig. S19.** Mass spectrum of the 2-NTPI-4

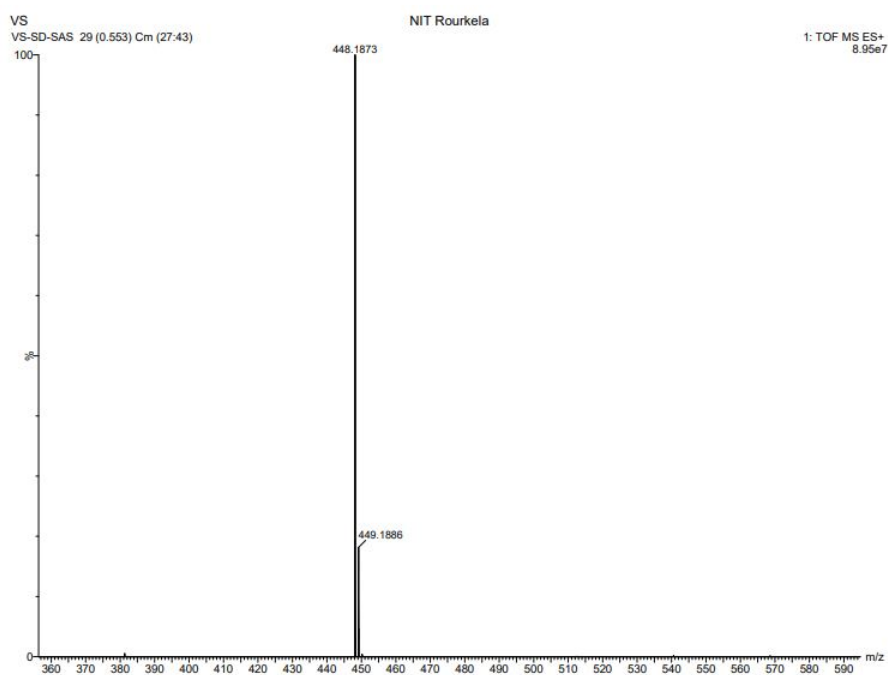

**Fig. S110.** Mass spectrum of the 2-NTPI-5

**S13.  $^1\text{H}$ -NMR spectra with PA (0, 0.5, 1.0 equiv) in  $\text{CDCl}_3$ .**

**$^1\text{H}$  NMR Spectra of all luminophores after the addition of PA :**

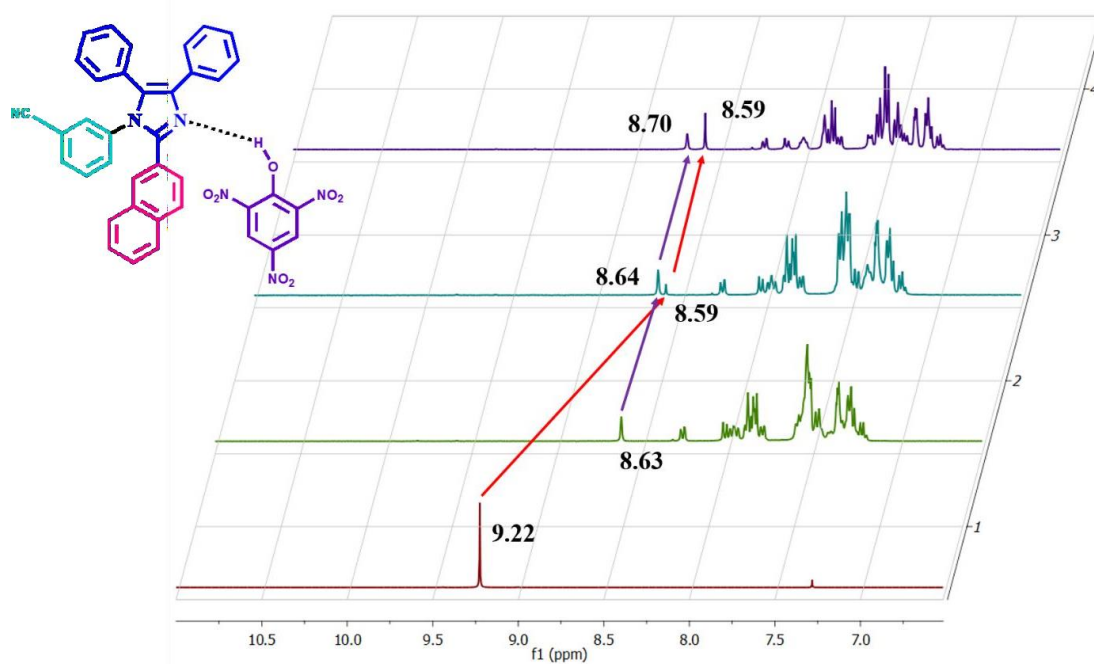

**Fig. SI11**  $^1\text{H}$  NMR spectrum of 2-NTPI-3 with PA (0, 0.5, 1.0 equiv) in  $\text{CDCl}_3$ .

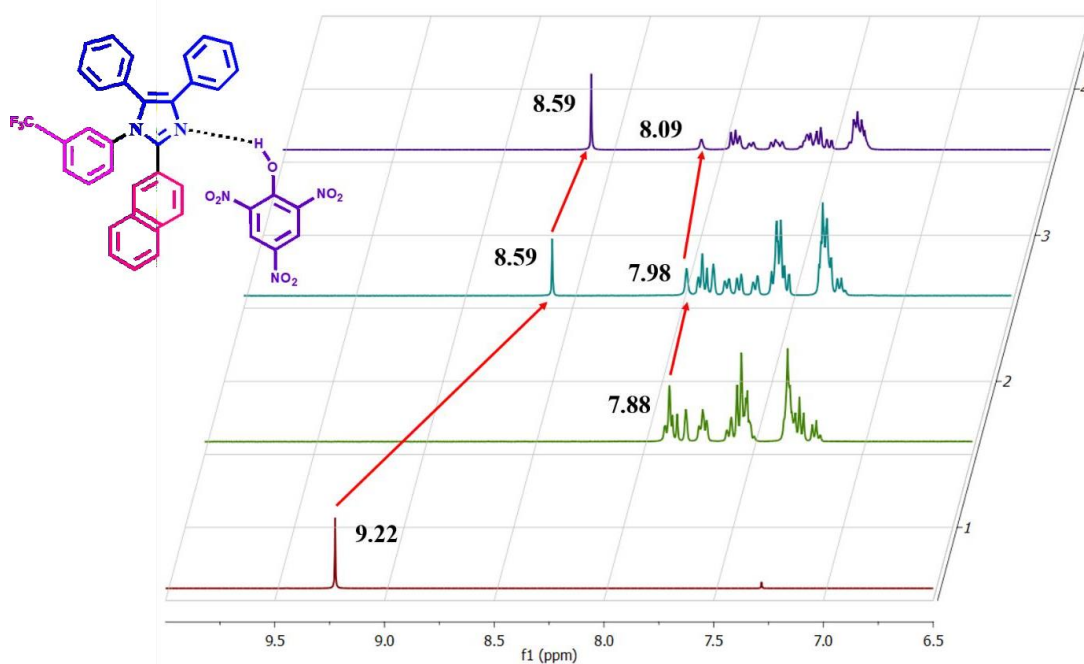

**Fig. SI12**  $^1\text{H}$  NMR spectrum of 2-NTPI-4 with PA (0, 0.5, 1.0 equiv) in  $\text{CDCl}_3$ .

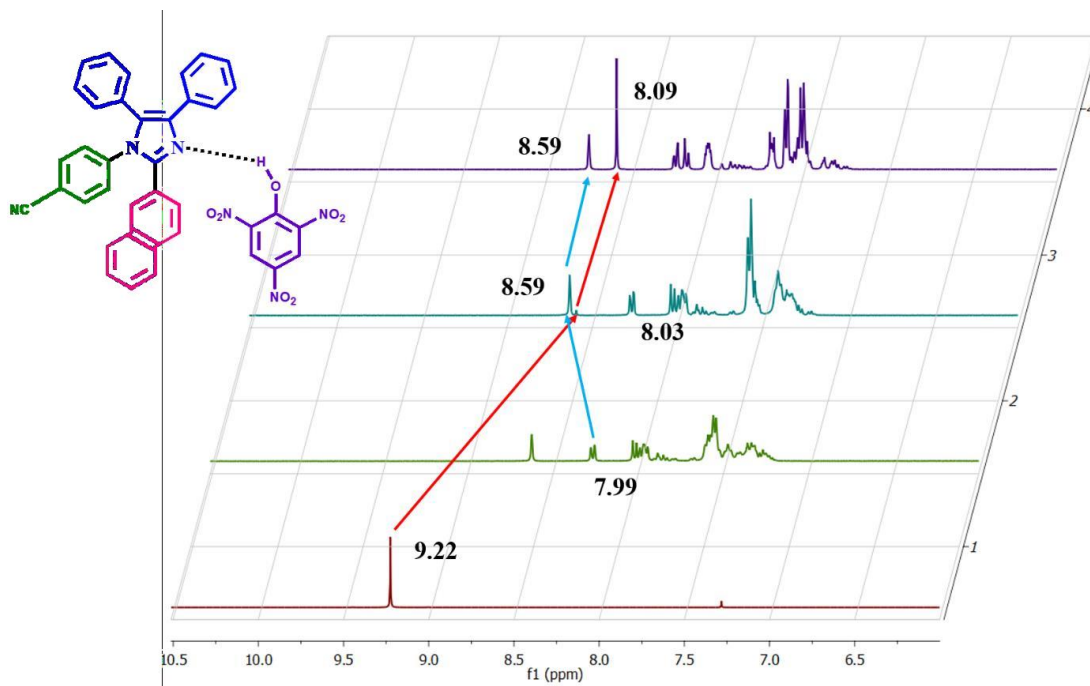

Fig. SI13  $^1\text{H}$  NMR spectrum of 2-NTPI-5 with PA (0, 0.5, 1.0 equiv) in  $\text{CDCl}_3$ .

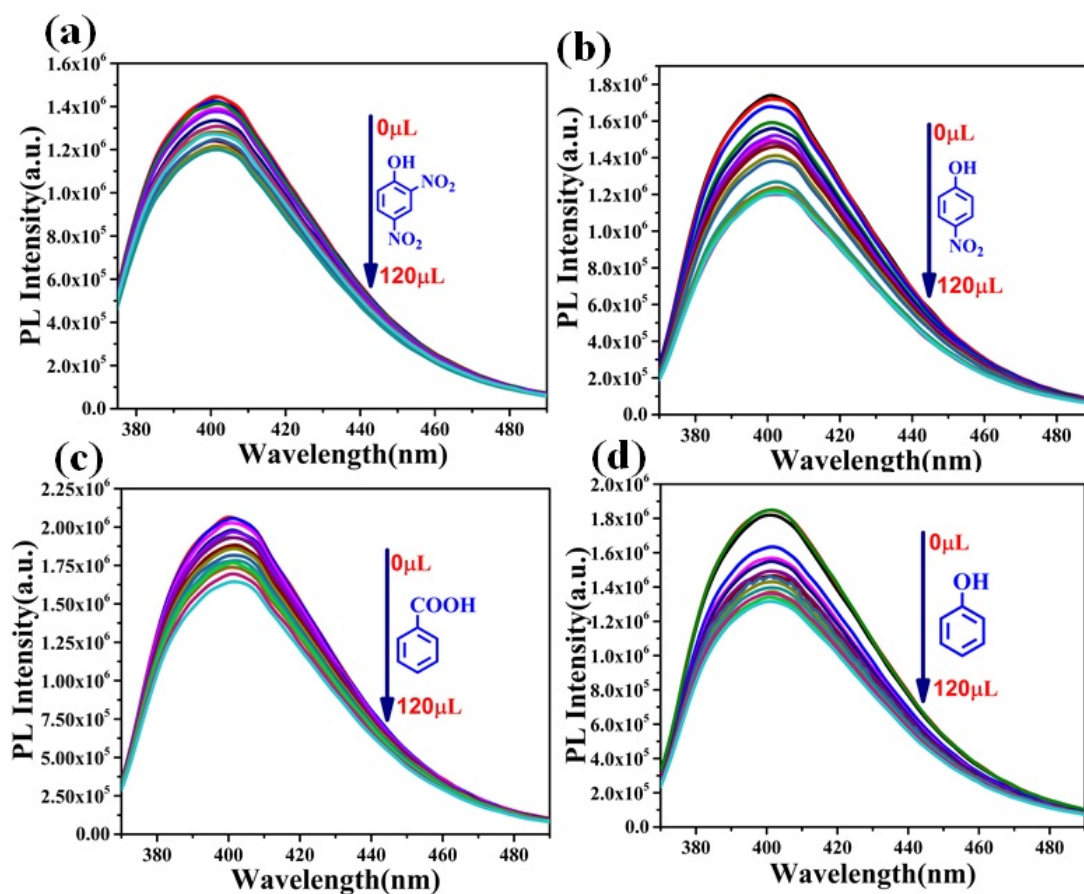

Fig. SI14. Change in the fluorescence of 2-NTPI-3 upon the addition of different quenchers excited at 341nm in THF solvent ( $1 \times 10^{-5}$  M).

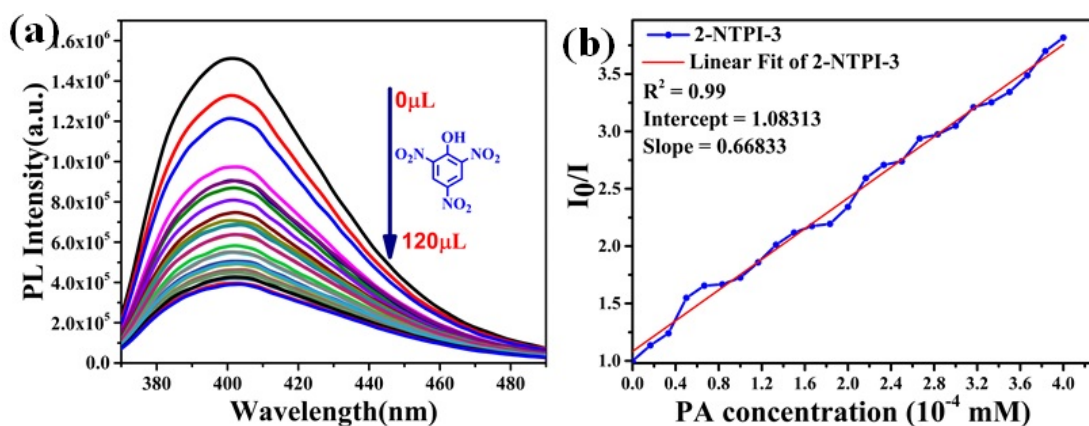

**Fig. SI15.** (a) Change in the fluorescence of 2-NTPI-3 upon the addition of PA excited at 341 nm in THF solvent ( $1 \times 10^{-5}$  M). (b) Stern–Volmer plots of 2-NTPI-3 using PA as a quencher. Inset: Stern–Volmer plots at lower concentration region of PA.

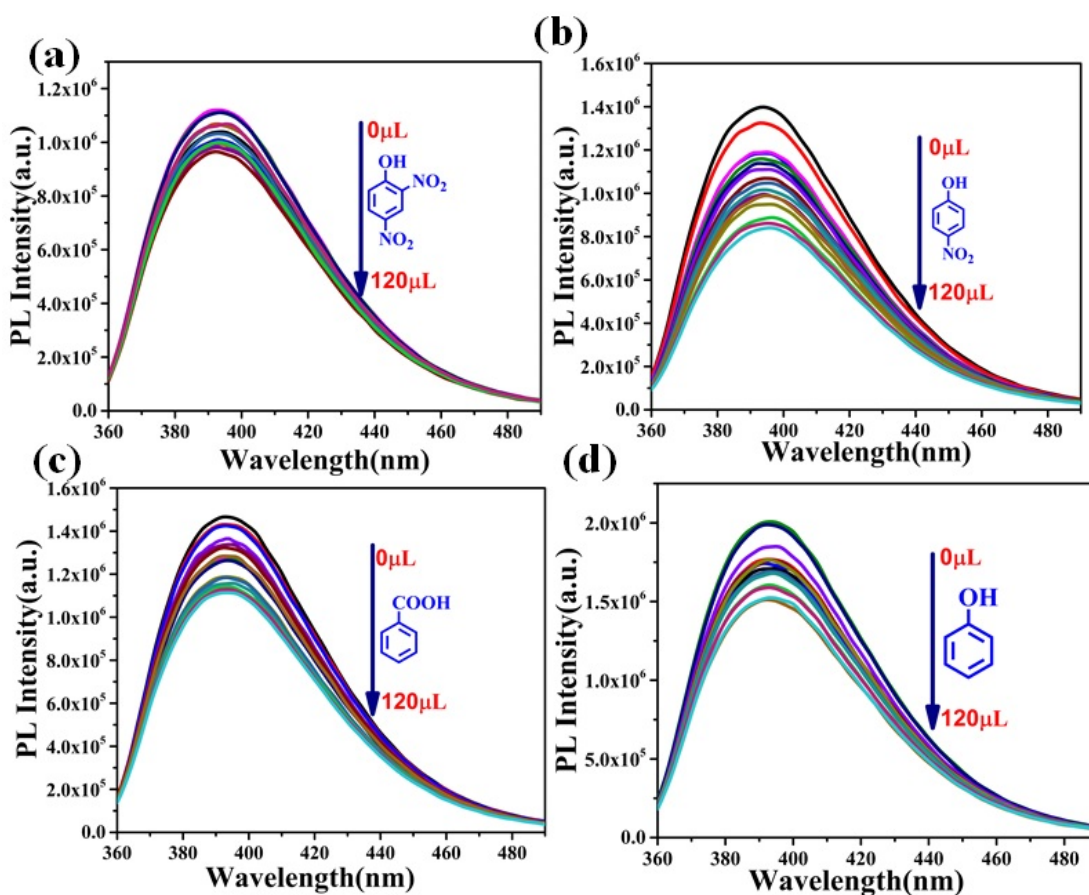

**Fig. SI16.** Change in the fluorescence of 2-NTPI-3 upon the addition of different quenchers excited at 337 nm in THF solvent ( $1 \times 10^{-5}$  M).



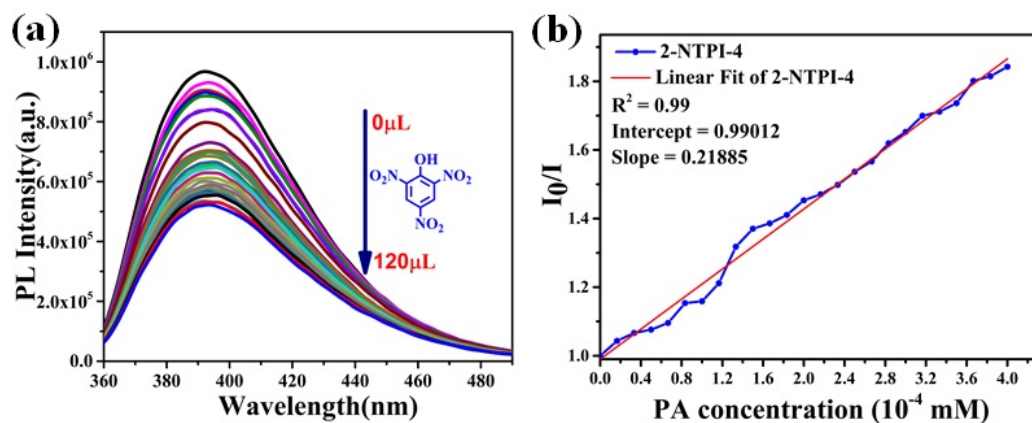

**Fig. SI17.** (a) Change in the fluorescence of 2-NTPI-4 upon the addition of PA excited at 337 nm in THF solvent ( $1 \times 10^{-5}$  M). (b) Stern–Volmer plots of 2-NTPI-4 using PA as a quencher. Inset: Stern–Volmer plots at lower concentration region of PA.

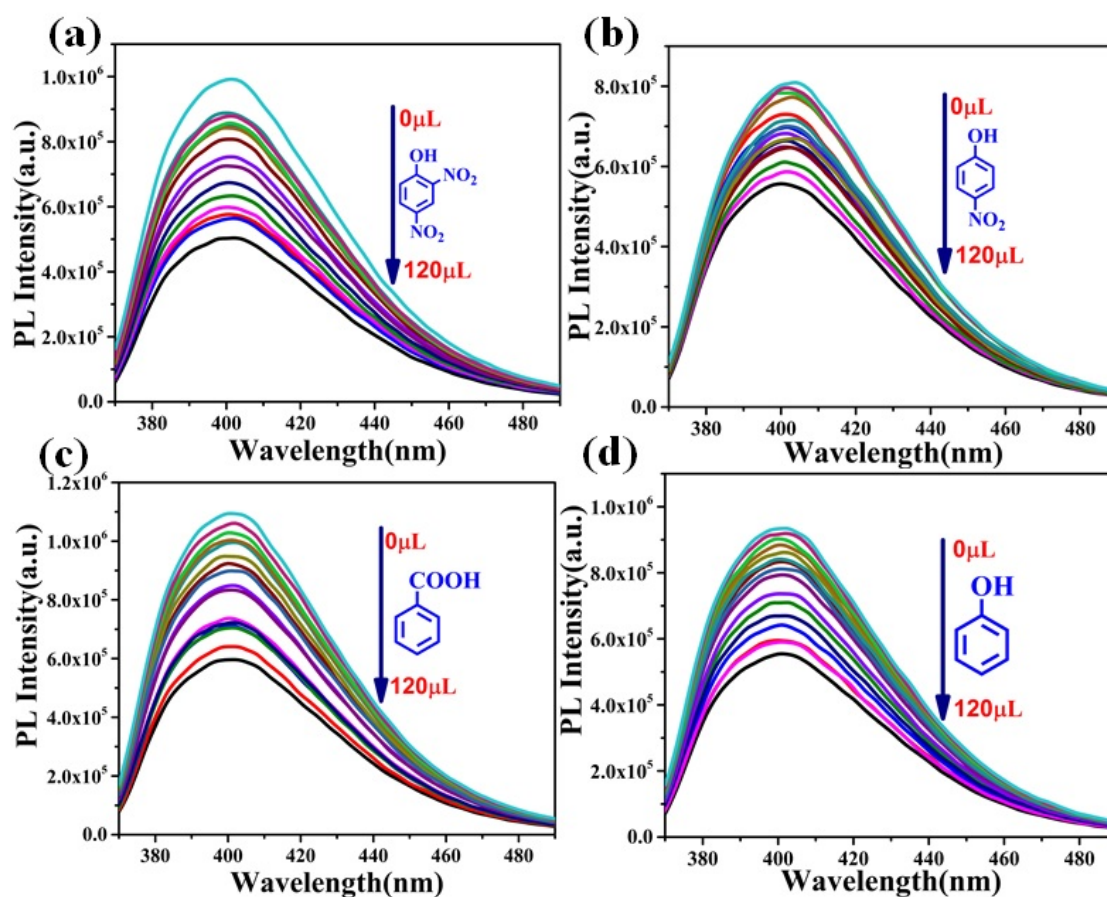

**Fig. SI18.** Change in the fluorescence of 2-NTPI-5 upon the addition of different quenchers excited at 335 nm in THF solvent ( $1 \times 10^{-5}$  M).

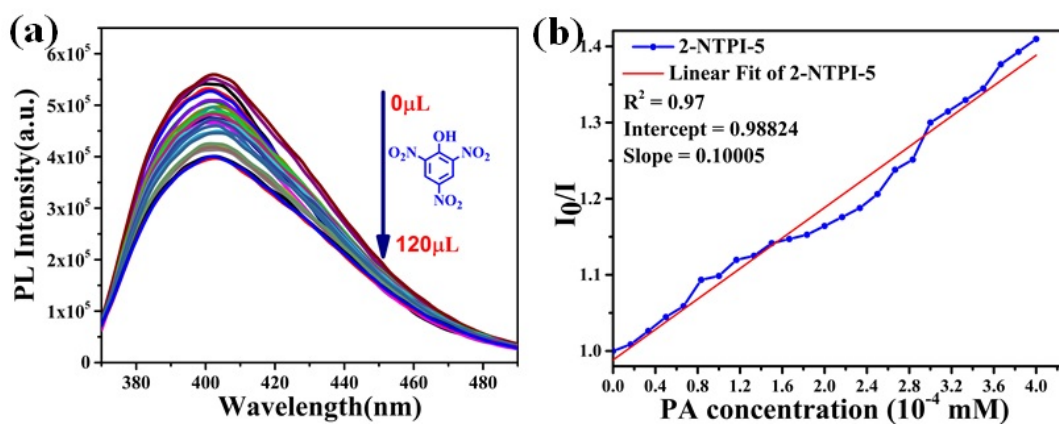

**Fig. SI19.** (a) Change in the fluorescence of 2-NTPI-5 upon the addition of PA excited at 335 nm in THF solvent ( $1 \times 10^{-5}$  M). (b) Stern–Volmer plots of 2-NTPI-5 using PA as a quencher. Inset: Stern–Volmer plots at lower concentration region of PA.

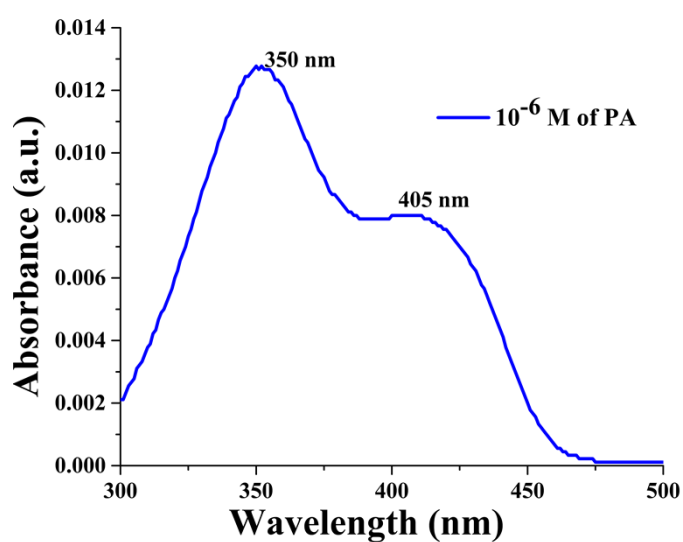

**Fig. SI20.** The absorbance spectra of picric acid in THF solution ( $10^{-6}$  M).



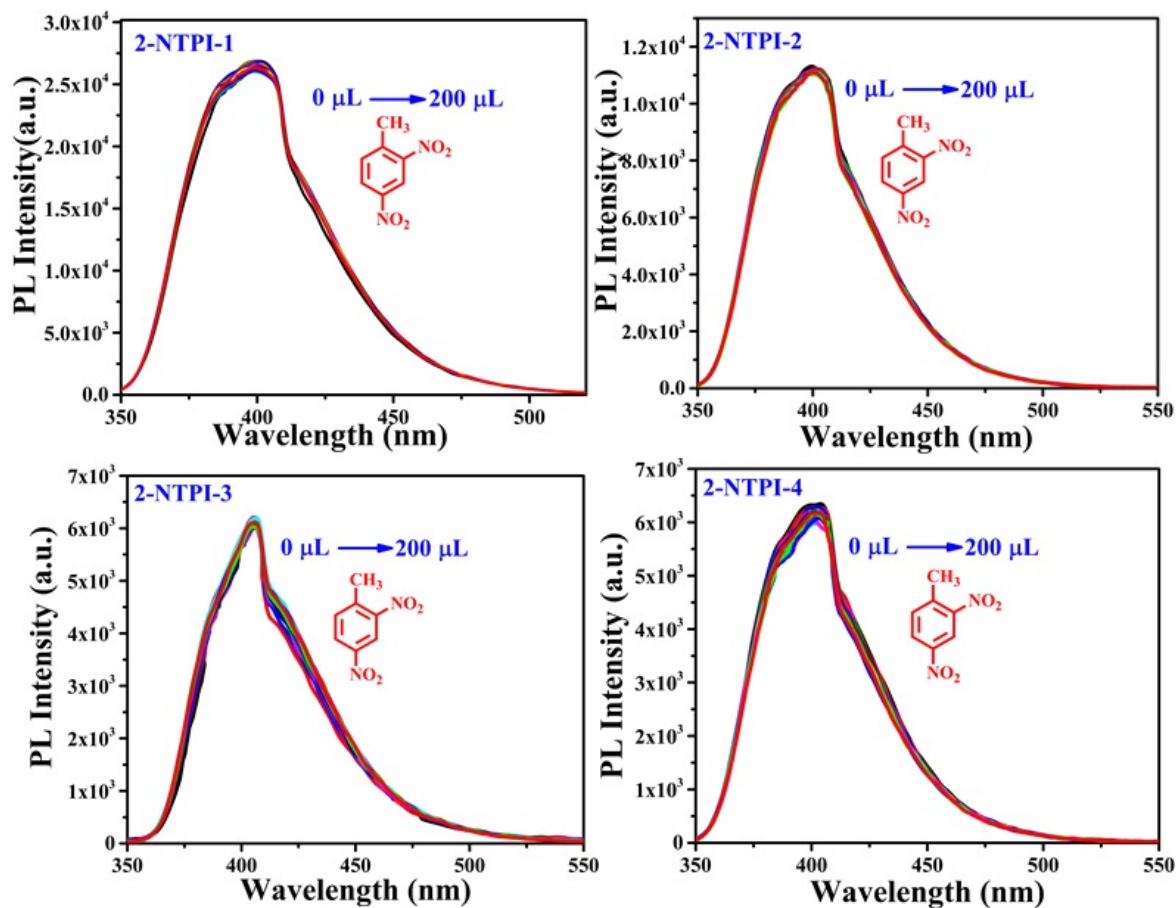

**Fig. SI21.** (a) Change in the fluorescence of 2-NTPI-1, 2-NTPI-2, 2-NTPI-3 and 2-NTPI-4 upon the addition of DNT excited at 325 nm in THF solvent ( $1 \times 10^{-5}$  M).

**Table ST1: The Comparison of our luminophores with other reported PA sensors.**

| S. No | Sensor                                                                                                   | Solvent   | Quenching constant (M <sup>-1</sup> ) | Detection limit (M) | Ref. |
|-------|----------------------------------------------------------------------------------------------------------|-----------|---------------------------------------|---------------------|------|
| 1     | Hexaphenylsilole<br>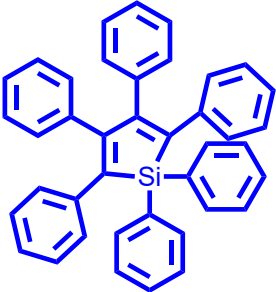  | THF/Water | -                                     | 4.81 ppb            | 1    |
| 2     | Tetraphenylethene<br> | Water     | $2.7 \times 10^5$                     | 0.4 ppm             | 2    |

|   |                                                                                                                                                       |                               |                     |                        |   |
|---|-------------------------------------------------------------------------------------------------------------------------------------------------------|-------------------------------|---------------------|------------------------|---|
| 3 | Polymers based on di<br>(naphthalen-2-yl)-<br>1,2-diphenylethene<br>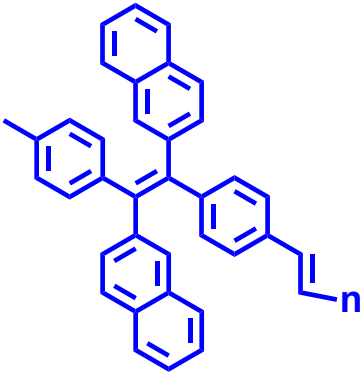 | H <sub>2</sub> O/THF<br>(9/1) | $4.70 \times 10^4$  | $1.81 \times 10^{-6}$  | 3 |
| 4 | Triazine-COF                                                                                                                                          | THF                           | $8.71 \times 10^4$  | 10.7 ppm               | 4 |
| 5 | poly(silylenevinylene)                                                                                                                                | THF                           | $8.491 \times 10^3$ | 1.0 ppm                | 5 |
| 6 | Diphenylfumaronitriles<br>                                           | H <sub>2</sub> O/THF<br>(8/2) | $5.60 \times 10^4$  | $1.80 \times 10^{-10}$ | 6 |
| 7 | Imidazole derivatives                                                                                                                                 | H <sub>2</sub> O/DMF<br>(9/1) | $1.30 \times 10^4$  | $3.55 \times 10^{-6}$  | 7 |
| 8 | Thiophene aromatic<br>amine derivatives<br>                        | THF                           | -                   | $5.70 \times 10^{-6}$  | 8 |
| 9 | 3-(Benzyloxy)-2-(4-<br>(di-p-tolylamino)phenyl)-<br>4H-chromen-4-one                                                                                  | Water                         | $1.93 \times 10^4$  | $3.70 \times 10^{-9}$  | 9 |

|    |                                                                                              |                      |                    |                       |    |
|----|----------------------------------------------------------------------------------------------|----------------------|--------------------|-----------------------|----|
|    | 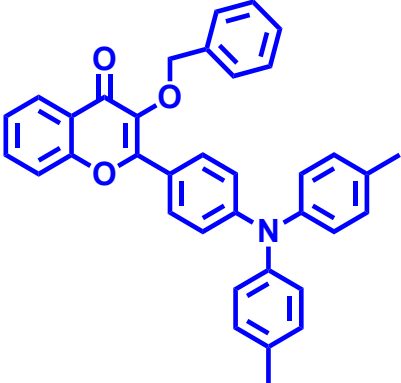            |                      |                    |                       |    |
| 10 | [P(dimethylacrylamide-co-Benzophenone acrylamide-co-glycidyl methacrylate)]                  | Water                | $7.75 \times 10^4$ | $5.60 \times 10^{-7}$ | 10 |
| 11 | 9,14-diphenylpyreno [4,5-g]isoquinoline                                                      | MeCN                 | -                  | $2.42 \times 10^{-6}$ | 11 |
|    |            |                      |                    |                       |    |
| 12 | 7,10-bis(4-bromophenyl)-8,9-bis(4-(2-(2-(2-methoxyethoxy) ethoxy)ethoxy)phenyl)-fluoranthene | EtOH                 | $5.60 \times 10^5$ | 2.6 ppb               | 12 |
|    |           |                      |                    |                       |    |
| 13 | Fluorescein derivatives                                                                      | EtOH                 | $2.50 \times 10^5$ | $1.10 \times 10^{-7}$ | 13 |
|    |           |                      |                    |                       |    |
| 14 | 1,3-Bis(benzo[d]thiazol-                                                                     | H <sub>2</sub> O/THF | $1.54 \times 10^5$ | 29.1 ppb              | 14 |

|    |                                                                                                                                             |           |                    |          |           |
|----|---------------------------------------------------------------------------------------------------------------------------------------------|-----------|--------------------|----------|-----------|
|    | 2-yl)benzene derivatives<br>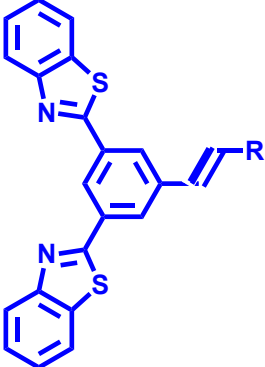                               | (9/1)     |                    |          |           |
| 15 | 1,3,5-tri(1H-benzo[d]imidazol-2-yl)benzene derivative<br> | THF       | $1.15 \times 10^5$ | 50 ppb   | 15        |
| 16 | tetraphenylethylene                                                                                                                         | THF       | $5.7 \times 10^4$  | 1.45 ppb | 16        |
| 17 | Terthiophene<br>                                         | THF/water | $5.7 \times 10^3$  | 70 ppb   | 17        |
| 18 | AC-2<br>                                                 | THF       | $2.5 \times 10^3$  | 450 ppb  | 18        |
| 19 | <b>2-NTPI-1</b>                                                                                                                             | THF       | $0.47 \times 10^4$ | 195ppb   | This work |

|    |                                                    |     |                    |        |           |
|----|----------------------------------------------------|-----|--------------------|--------|-----------|
|    |                                                    |     |                    |        |           |
| 20 | <p style="text-align: center;"><b>2-NTPI-2</b></p> | THF | $1.88 \times 10^4$ | 446ppb | This work |
| 21 | <p style="text-align: center;"><b>2-NTPI-3</b></p> | THF | $2.19 \times 10^4$ | 202ppb | This work |
| 22 | <p style="text-align: center;"><b>2-NTPI-4</b></p> | THF | $0.64 \times 10^4$ | 297ppb | This work |
| 23 | <p style="text-align: center;"><b>2-NTPI-5</b></p> | THF | $0.34 \times 10^4$ | 401ppb | This work |

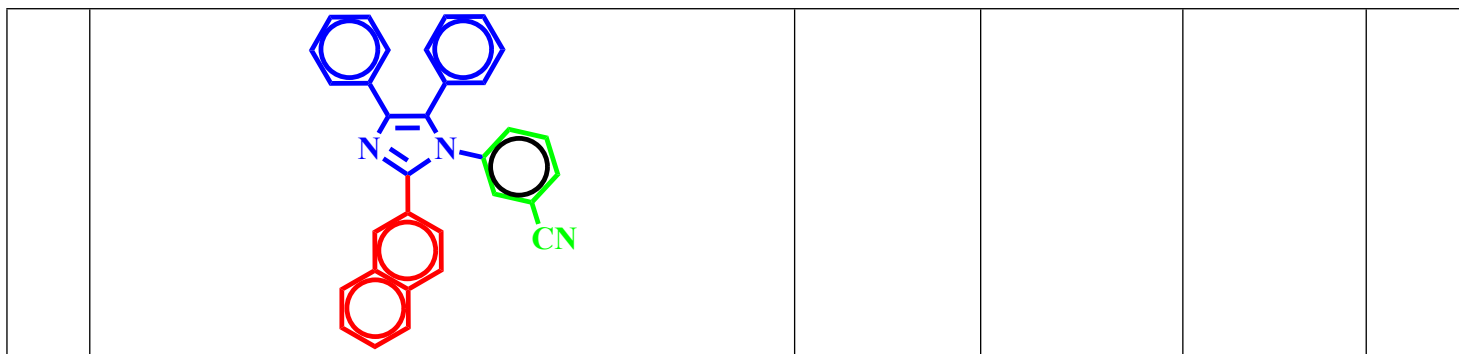

SI5 DFT analysis of luminophores with and without PA.

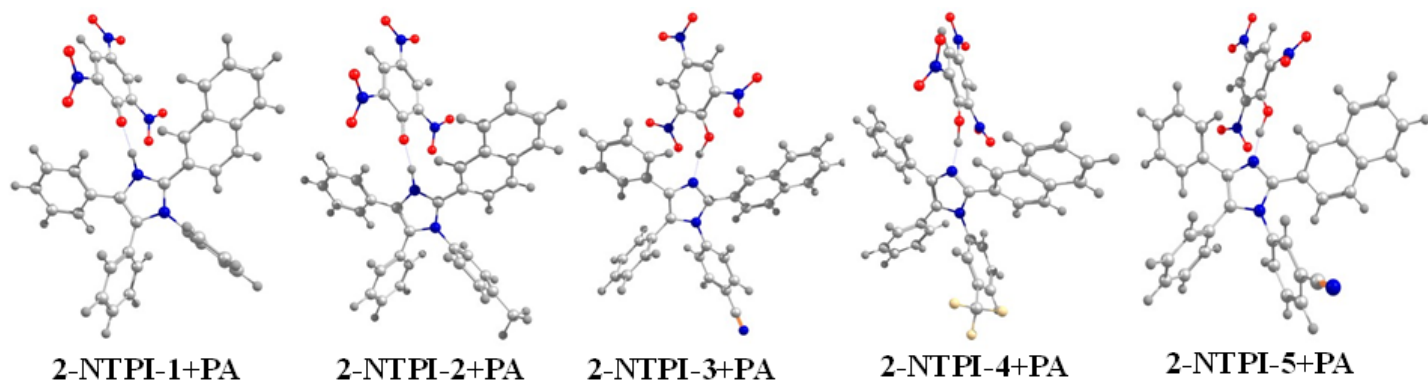

Fig. SI22 Optimized geometry of luminophores interacted with PA obtained from DFT using Gaussian 09 program.

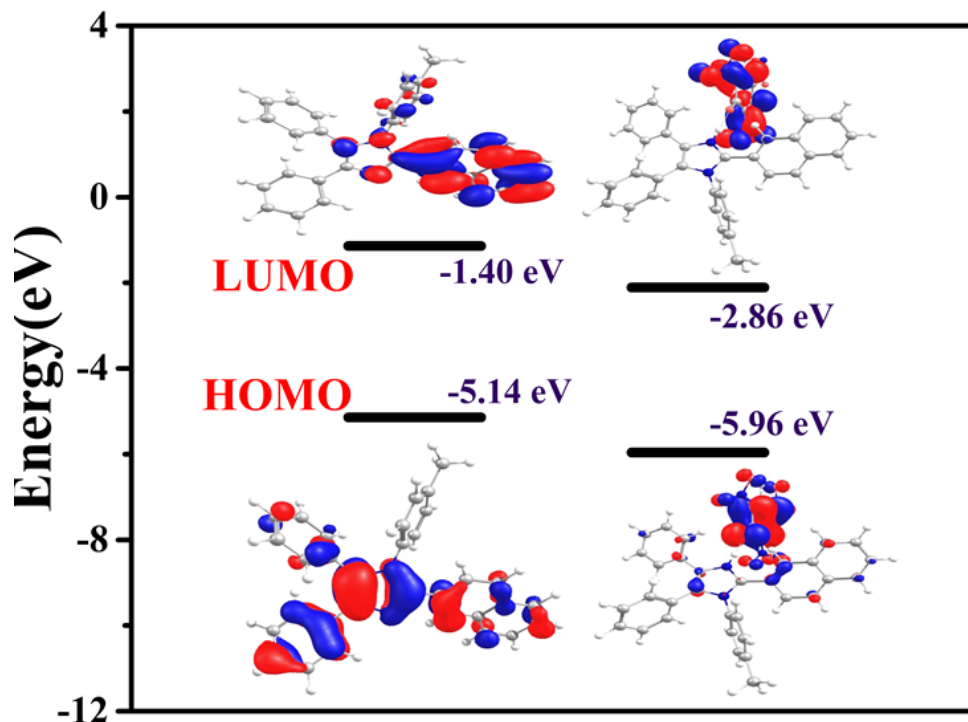

Fig. SI23 Frontier molecular orbitals of 2-NTPI-2 and 2-NTPI-2+ PA obtained from DFT using Gaussian 09 program.

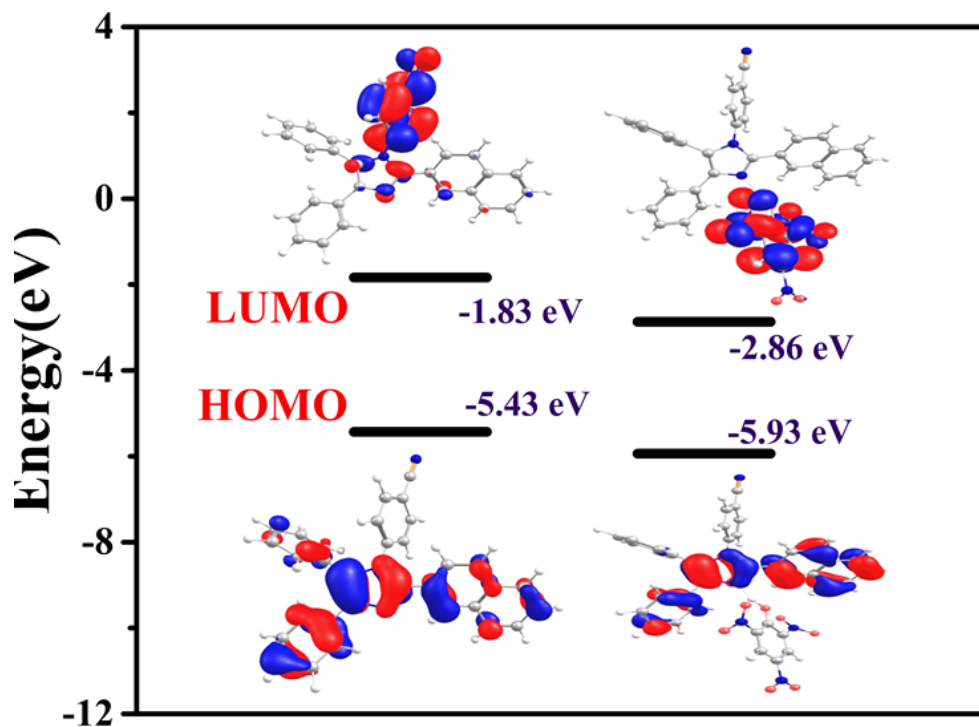

**Fig. SI24** Frontier molecular orbitals of 2-NTPI-3 and 2-NTPI-3+ PA obtained from DFT using Gaussian 09 program.

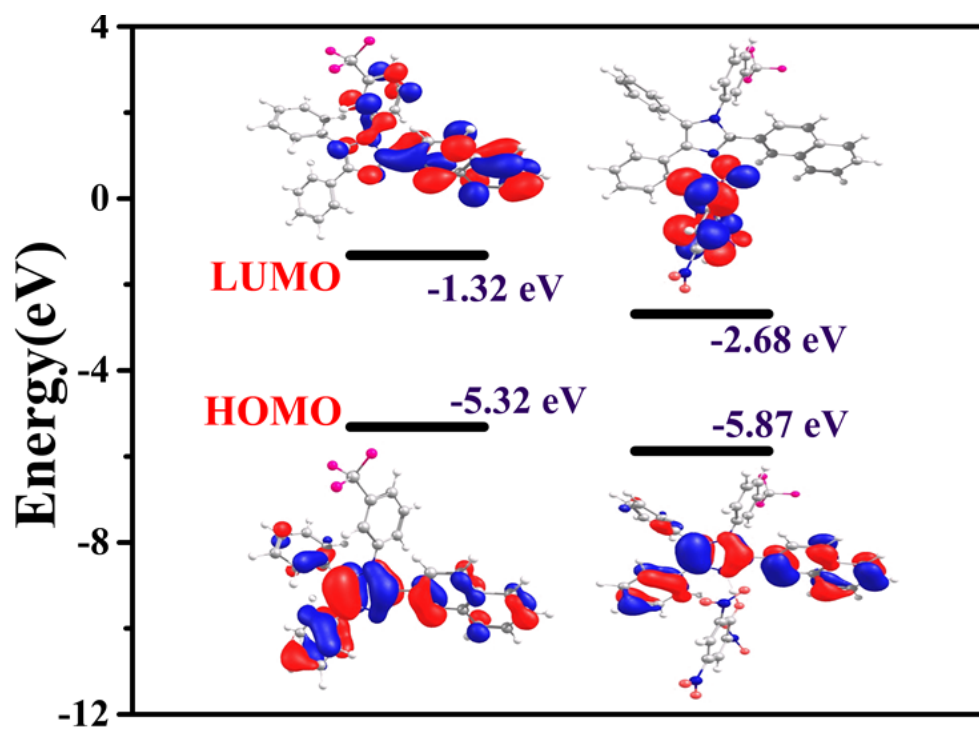

**Fig. SI25** Frontier molecular orbitals of 2-NTPI-4 and 2-NTPI-4+PA obtained from DFT using Gaussian 09 program.

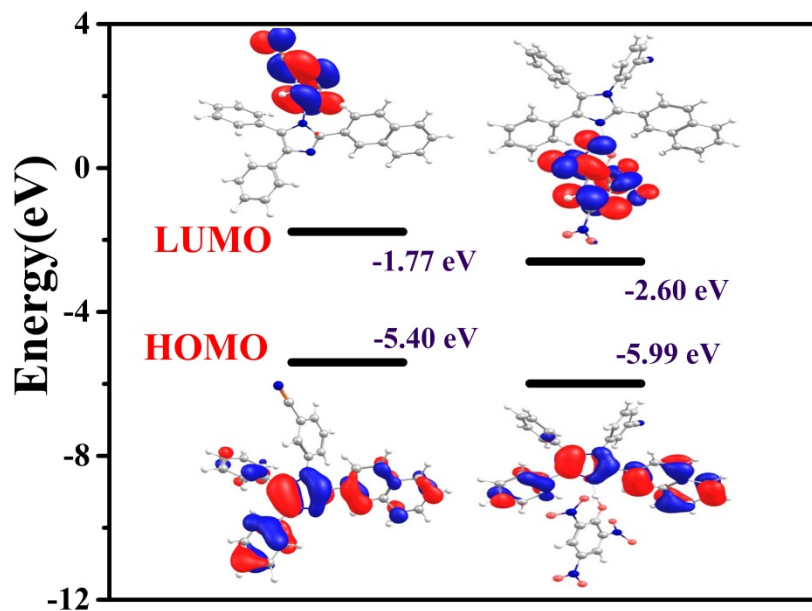

**Fig. SI26** Frontier molecular orbitals of 2-NTPI-5 and 2-NTPI-5+ PA obtained from DFT using Gaussian 09 program.

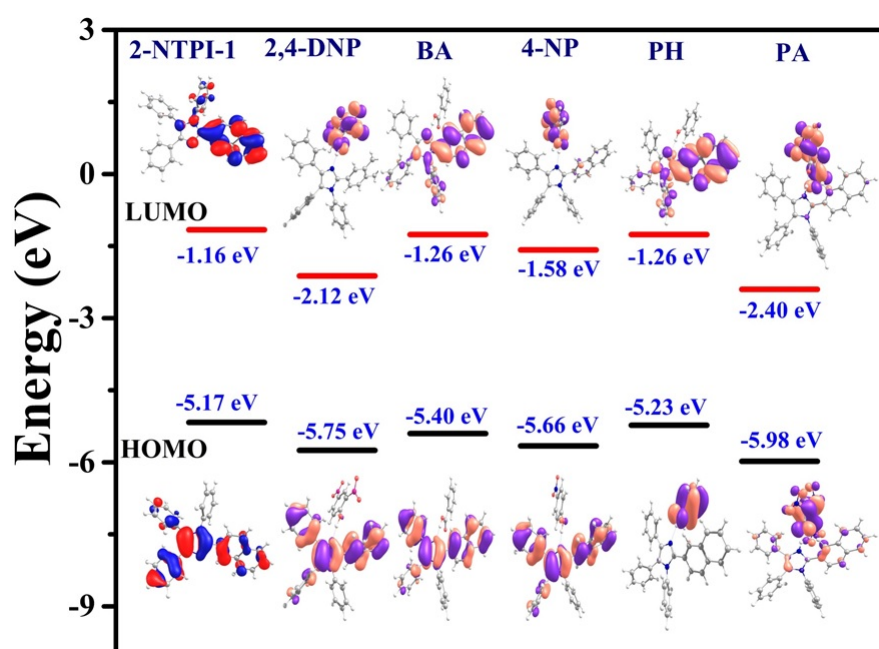

**Fig. SI27** Frontier molecular orbitals of 2-NTPI-1 and different quenchers obtained from DFT.



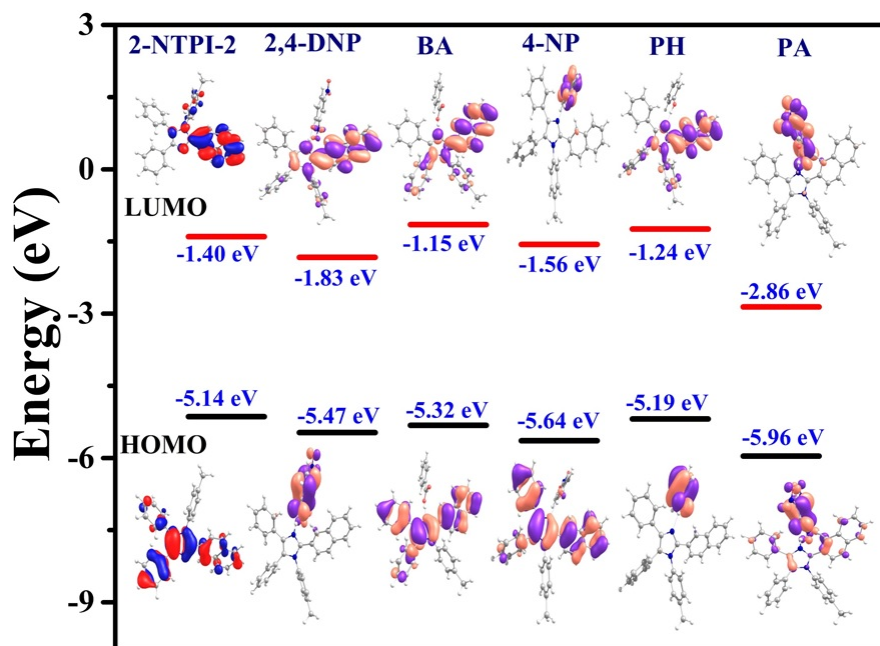

Fig. SI28 Frontier molecular orbitals of 2-NTPI-2 and different quenchers obtained from DFT.

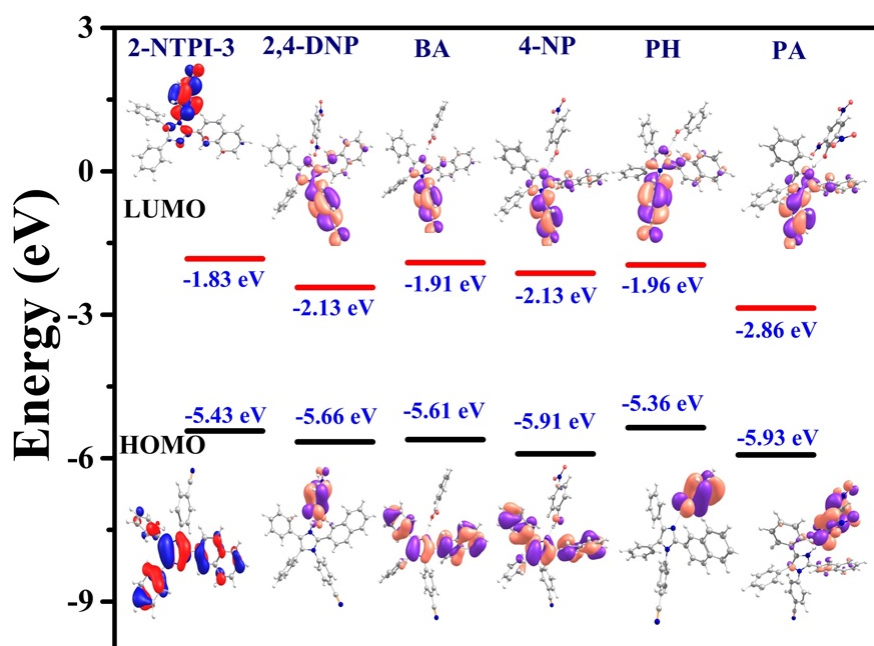

Fig. SI29 Frontier molecular orbitals of 2-NTPI-3 and different quenchers obtained from DFT.

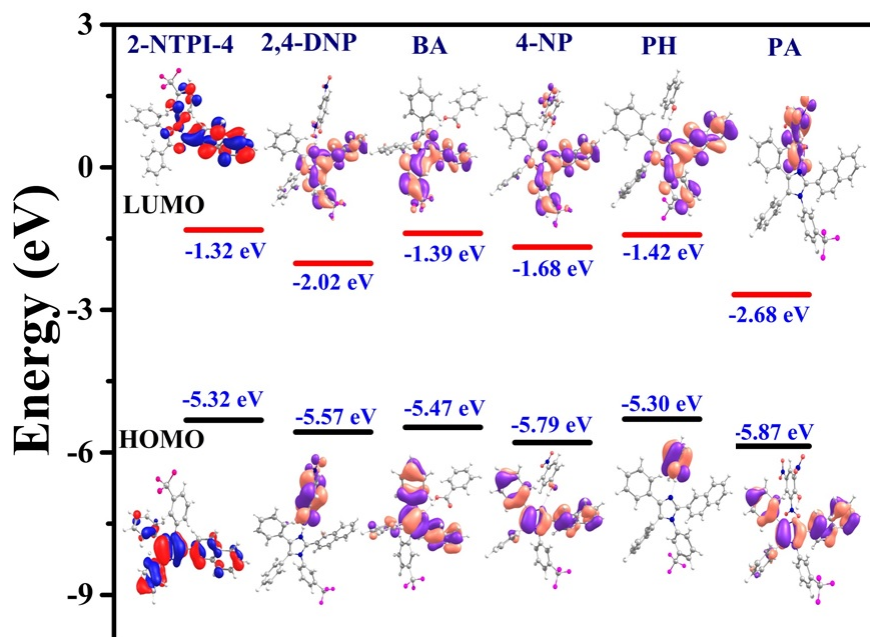

**Fig. SI30** Frontier molecular orbitals of 2-NTPI-4 and different quenchers obtained from DFT.

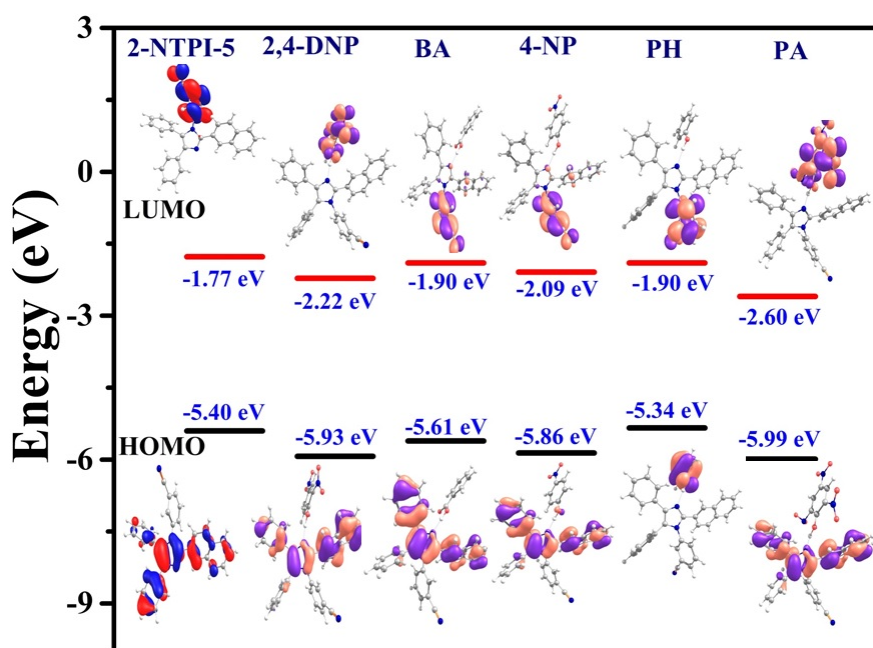

**Fig. SI31** Frontier molecular orbitals of 2-NTPI-5 and different quenchers obtained from DFT.

**SI6. Lifetime of the respective luminophores in presence and absence of PA.**

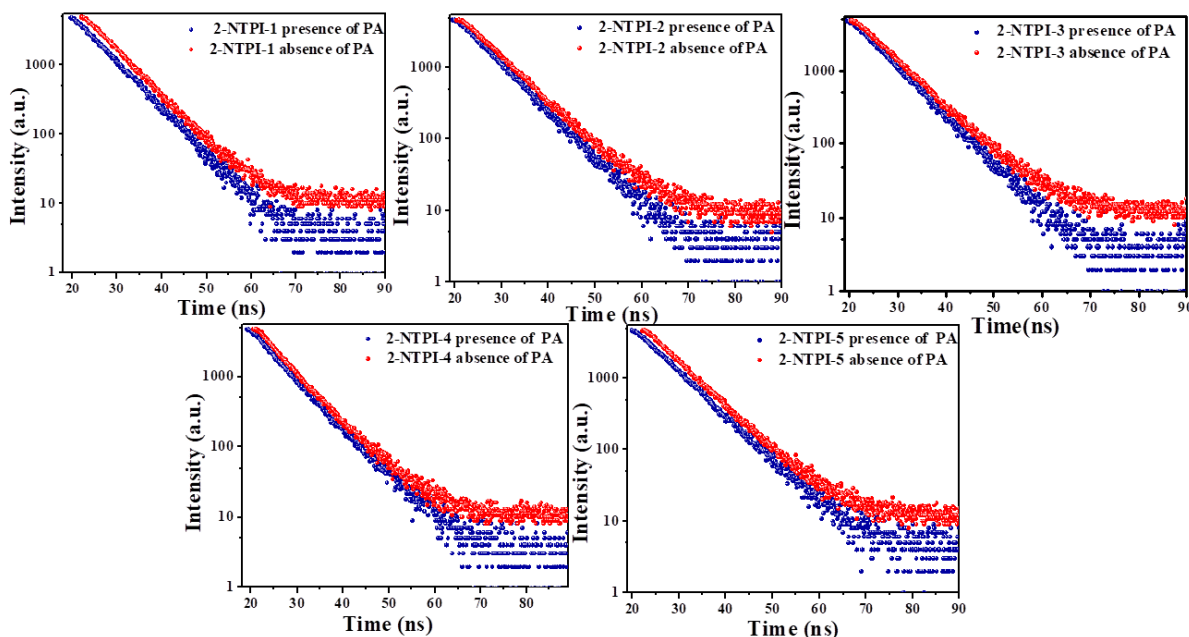

**Fig. SI32** Lifetime of all the luminophores in the absence and presence of PA.

The fluorescence lifetime of the luminophores were estimated by using the time-correlated single-photon counting technique and the decay curves are shown in **Fig. SI32** (supporting information). The decay curve was fitted into the bi-exponential function and the average lifetime of the fluorophores is calculated by equation (1).<sup>5</sup>

$$I(t) = A_1 \exp\left(-\frac{t}{\tau_1}\right) + A_2 \exp\left(-\frac{t}{\tau_2}\right) + I_0 \dots\dots\dots(1)$$

In the above equation,  $I_0$  and  $I(t)$  at time 0 and  $t$ , denotes the intensities,  $A_1$  and  $A_2$  represent as constants,  $\tau_1$  and  $\tau_2$  represent as constant the fast and slow decay. The average lifetime ( $\tau_{avg}$ ) value can be predictable from the subsequent double exponential equation (2):

$$\tau_{avg} = \frac{A_1 \tau_1^2 + A_2 \tau_2^2}{A_1 \tau_1 + A_2 \tau_2} \dots\dots\dots(2)$$

**Table ST2: Lifetime of the respective luminophores in nanosecond range**

| Compound        | Lifetime without PA (s) | Lifetime with PA (s)    |
|-----------------|-------------------------|-------------------------|
| <b>2-NTPI-1</b> | 4.77 x 10 <sup>-9</sup> | 3.98 x 10 <sup>-9</sup> |
| <b>2-NTPI-2</b> | 5.12 x 10 <sup>-9</sup> | 4.69 x 10 <sup>-9</sup> |
| <b>2-NTPI-3</b> | 5.14 x 10 <sup>-9</sup> | 4.76 x 10 <sup>-9</sup> |

|                 |                         |                         |
|-----------------|-------------------------|-------------------------|
| <b>2-NTPI-4</b> | 4.30 x 10 <sup>-9</sup> | 3.92 x 10 <sup>-9</sup> |
| <b>2-NTPI-5</b> | 5.05 x 10 <sup>-9</sup> | 4.90x 10 <sup>-9</sup>  |

**Table ST3: Computed Vertical Transitions and Their Oscillator Strengths and Configurations**

| Compound         | State            | <i>f</i> | $\lambda_{\max}$ nm | Energy (eV) | Configuration                                                                                      |
|------------------|------------------|----------|---------------------|-------------|----------------------------------------------------------------------------------------------------|
| <b>2-NTPI- 1</b> | Triplet          | 0        | 485.34              | 2.5546      | HOMO → LUMO+3 (10.25%)<br>HOMO-1 → LUMO (41.01%)<br>HOMO-1 → LUMO+2(11.88%)<br>HOMO →LUMO (50.56%) |
|                  | S1               | 0.222    | 348.98              | 3.5528      | HOMO → LUMO (68.84%)                                                                               |
|                  | S2               | 0.1199   | 325.05              | 3.8143      | HOMO → LUMO (68.01%)                                                                               |
|                  | S3               | 0.665    | 313.63              | 3.9533      | HOMO → LUMO+2 (68.79 %)                                                                            |
| <b>2-NTPI -2</b> | Triplet          | 0        | 485.87              | 2.551       | HOMO-1 → LUMO+1 (10.4%)<br>HOMO-1→LUMO(41.2%)<br>HOMO → LUMO (50.6%)                               |
|                  | S1               | 0.223    | 349.31              | 3.549       | HOMO → LUMO (68.84%)                                                                               |
|                  | S2               | 0.167    | 323.76              | 3.8295      | HOMO → LUMO+1 (68.18%)                                                                             |
|                  | <b>2-NTPI -3</b> | Triplet  | 0                   | 485.1       | 2.5558                                                                                             |
| S1               |                  | 0.015    | 358.01              | 3.463       | HOMO → LUMO+1 (70.23%)                                                                             |
| S2               |                  | 0.164    | 354.10              | 3.5014      | HOMO → LUMO (67.97%)                                                                               |
| <b>2-NTPI -4</b> |                  | Triplet  | 0                   | 485.11      | 2.555                                                                                              |

|                 |         |        |        |        |                                                                                                                              |
|-----------------|---------|--------|--------|--------|------------------------------------------------------------------------------------------------------------------------------|
|                 | S1      | 0.0154 | 358.01 | 3.463  | HOMO → LUMO+1 (70.23%)                                                                                                       |
|                 | S2      | 0.164  | 354.10 | 3.5014 | HOMO → LUMO (67.97%)                                                                                                         |
| <b>2-NTPI-5</b> | Triplet | 0      | 484.25 | 2.5604 | HOMO-1→LUMO+1 (36.49%)<br>HOMO→LUMO+1(47.32%)<br>HOMO-1→ LUMO+2 (21.68%)<br>HOMO-1→ LUMO+3 (12.41%)<br>HOMO → LUMO+2 (16.7%) |
|                 | S1      | 0.004  |        | 3.0803 | HOMO-1→ LUMO (50.13%)                                                                                                        |
|                 | S2      | 0.0694 |        | 3.4691 | HOMO → LUMO+2 (47.07%)                                                                                                       |
|                 | S3      | 0.2249 |        | 3.7847 | HOMO-1→LUMO (50.73%)<br>HOMO→LUMO+2 (47.07)                                                                                  |

**Table ST4: FMO orbitals of the luminophores**

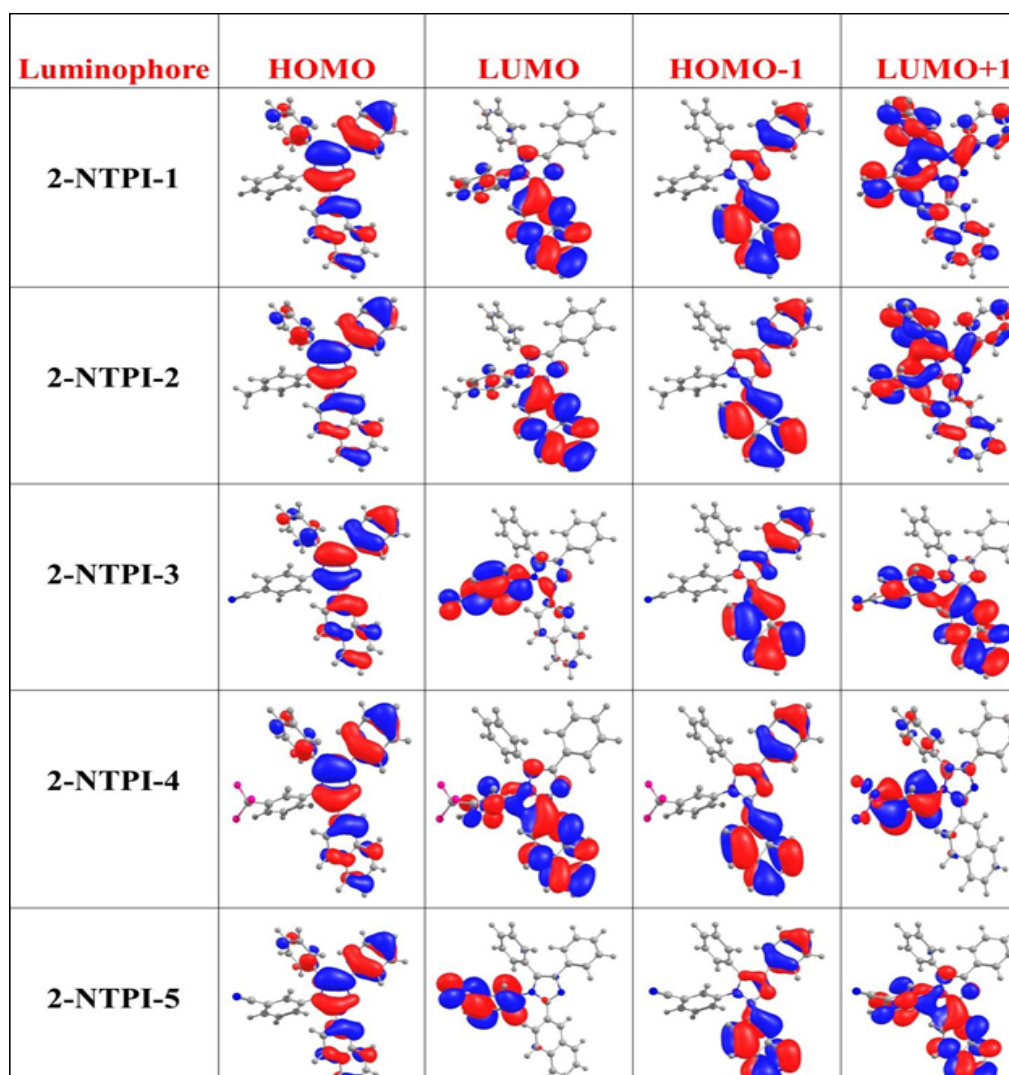

## 2-NTPI-1

55

symmetry c1

|   |            |            |            |
|---|------------|------------|------------|
| C | 1.6073430  | 0.0436310  | -0.0171230 |
| C | 1.3594600  | -1.3229910 | -0.0523110 |
| C | -2.0510890 | -0.2172130 | -0.2232660 |
| C | -2.8474020 | -1.2058970 | 0.3328010  |
| C | -2.6756700 | 0.8638950  | -0.9117030 |
| C | -4.2600870 | -1.1559330 | 0.2473870  |
| H | -2.3708130 | -2.0402270 | 0.8372240  |
| C | -4.0445130 | 0.9367380  | -1.0086630 |
| H | -2.0667790 | 1.6261590  | -1.3827500 |
| C | -4.8794830 | -0.0572780 | -0.4328440 |
| H | -4.5060310 | 1.7622090  | -1.5443640 |
| C | -0.5892480 | -0.3757760 | -0.1334180 |
| C | 0.0871520  | 2.0521080  | 0.0363420  |
| C | 0.5459410  | 2.9147860  | -0.9635210 |
| C | -0.6203810 | 2.5546090  | 1.1323630  |
| C | 0.2927850  | 4.2825020  | -0.8636080 |
| H | 1.0975370  | 2.5112860  | -1.8055970 |
| C | -0.8789960 | 3.9223020  | 1.2186780  |
| H | -0.9667760 | 1.8728060  | 1.9018100  |
| C | -0.4220890 | 4.7884090  | 0.2237830  |
| H | 0.6517540  | 4.9516910  | -1.6395210 |
| H | -1.4337030 | 4.3101530  | 2.0675580  |
| H | -0.6212400 | 5.8532660  | 0.2959240  |
| N | 0.3441370  | 0.6465650  | -0.0573300 |
| N | 0.0060610  | -1.5526170 | -0.1301870 |
| C | -6.2961880 | -0.0075520 | -0.5130200 |
| H | -6.7622690 | 0.8265570  | -1.0313220 |
| C | -7.0684700 | -0.9966790 | 0.0532980  |
| H | -8.1513330 | -0.9480420 | -0.0145940 |
| C | -6.4574630 | -2.0835610 | 0.7268240  |
| H | -7.0779780 | -2.8577470 | 1.1685340  |
| C | -5.0868900 | -2.1609150 | 0.8211940  |
| H | -4.6149790 | -2.9938190 | 1.3355320  |
| C | 2.8665860  | 0.8128890  | 0.0191170  |
| C | 3.8354080  | 0.6142360  | -0.9798400 |
| C | 3.1354350  | 1.7410910  | 1.0392530  |
| C | 5.0373570  | 1.3193380  | -0.9559970 |
| H | 3.6380200  | -0.1013980 | -1.7716090 |
| C | 4.3354910  | 2.4506180  | 1.0569920  |
| H | 3.8868990  | -1.4551000 | 1.0482780  |
| C | 5.2906240  | 2.2422310  | 0.0607670  |
| H | 5.7745020  | 1.1511340  | -1.7357560 |
| H | 4.5262910  | 3.1629060  | 1.8544520  |
| H | 6.2261140  | 2.7936510  | 0.0773290  |
| C | 2.2934920  | -2.4634940 | -0.0061610 |
| C | 1.8873980  | -3.6937740 | -0.5520340 |
| C | 3.5629050  | -2.3832080 | 0.5911910  |
| C | 2.7317880  | -4.8008050 | -0.5210970 |
| H | 0.8994070  | -3.7628260 | -0.9937770 |
| C | 4.4065510  | -3.4927330 | 0.6168880  |
| C | 3.9983860  | -4.7052810 | 0.0590080  |
| H | 2.4000780  | -5.7413200 | -0.9523150 |

|   |           |            |           |
|---|-----------|------------|-----------|
| H | 5.3833980 | -3.4107920 | 1.0854510 |
| H | 4.6577800 | -5.5681640 | 0.0821140 |
| H | 2.4019470 | 1.9022240  | 1.8223440 |

## 2-NTPI-2

58

symmetry c1

|   |            |            |            |
|---|------------|------------|------------|
| C | 1.6382750  | -0.1314220 | -0.0271050 |
| C | 1.4335120  | -1.5055980 | -0.0484810 |
| C | -2.0096480 | -0.5088290 | -0.2294790 |
| C | -2.7735390 | -1.5229720 | 0.3265690  |
| C | -2.6694910 | 0.5515790  | -0.9172730 |
| C | -4.1870820 | -1.5188490 | 0.2417380  |
| H | -2.2697790 | -2.3414410 | 0.8305480  |
| C | -4.0400590 | 0.5801640  | -1.0132620 |
| H | -2.0858600 | 1.3332330  | -1.3882180 |
| C | -4.8421720 | -0.4404320 | -0.4374650 |
| H | -4.5284710 | 1.3903270  | -1.5485480 |
| C | -0.5434830 | -0.6201790 | -0.1395370 |
| C | 0.0569700  | 1.8291170  | 0.0062100  |
| C | 0.4735760  | 2.6980620  | -1.0050650 |
| C | -0.6486120 | 2.3280500  | 1.1042430  |
| C | 0.1797500  | 4.0572410  | -0.9136700 |
| H | 1.0298340  | 2.3084710  | -1.8508310 |
| C | -0.9445820 | 3.6874140  | 1.1774370  |
| H | -0.9631350 | 1.6499420  | 1.8906610  |
| C | -0.5379960 | 4.5754900  | 0.1724420  |
| H | 0.5131240  | 4.7260600  | -1.7026100 |
| H | -1.4956950 | 4.0649960  | 2.0346290  |
| N | 0.3573250  | 0.4311610  | -0.0738350 |
| N | 0.0882210  | -1.7782350 | -0.1238800 |
| C | -6.2597870 | -0.4365720 | -0.5168050 |
| H | -6.7529510 | 0.3822800  | -1.0344350 |
| C | -6.9993280 | -1.4506050 | 0.0491600  |
| H | -8.0832460 | -1.4370950 | -0.0182060 |
| C | -6.3530510 | -2.5176490 | 0.7215360  |
| H | -6.9479360 | -3.3118710 | 1.1629620  |
| C | -4.9806410 | -2.5505520 | 0.8151730  |
| H | -4.4815770 | -3.3679780 | 1.3287120  |
| C | 2.8721390  | 0.6783520  | -0.0019010 |
| C | 3.8435870  | 0.5020380  | -1.0024000 |
| C | 3.1149060  | 1.6230850  | 1.0096970  |
| C | 5.0226040  | 1.2451960  | -0.9889360 |
| H | 3.6664830  | -0.2261900 | -1.7874780 |
| C | 4.2917410  | 2.3706160  | 1.0169280  |
| H | 3.9599800  | -1.5463460 | 1.0578480  |
| C | 5.2496920  | 2.1843800  | 0.0189420  |
| H | 5.7621360  | 1.0937430  | -1.7698900 |
| H | 4.4626340  | 3.0952140  | 1.8078280  |
| H | 6.1671990  | 2.7654400  | 0.0275290  |
| C | 2.4025520  | -2.6158080 | 0.0106760  |
| C | 2.0366220  | -3.8644760 | -0.5215980 |
| C | 3.6668240  | -2.4894170 | 0.6107240  |
| C | 2.9146540  | -4.9444420 | -0.4738880 |

|   |            |            |            |
|---|------------|------------|------------|
| H | 1.0527910  | -3.9695120 | -0.9655440 |
| C | 4.5438740  | -3.5720850 | 0.6546700  |
| C | 4.1751710  | -4.8033280 | 0.1102900  |
| H | 2.6137930  | -5.8999460 | -0.8946970 |
| H | 5.5156510  | -3.4543060 | 1.1261110  |
| H | 4.8601710  | -5.6455590 | 0.1470390  |
| H | 2.3792610  | 1.7670490  | 1.7944330  |
| C | -0.8847900 | 6.0432300  | 0.2473220  |
| H | -0.1602350 | 6.6543900  | -0.2982410 |
| H | -1.8718350 | 6.2389320  | -0.1897920 |
| H | -0.9142980 | 6.3948920  | 1.2828570  |

## 2-NTPI-3

56

symmetry c1

|   |            |            |            |
|---|------------|------------|------------|
| C | 1.6731730  | -0.1915290 | -0.0343020 |
| C | 1.5301160  | -1.5717470 | -0.0421880 |
| C | -1.9571280 | -0.7342350 | -0.2427240 |
| C | -2.6894510 | -1.7439590 | 0.3605640  |
| C | -2.6443500 | 0.2624650  | -0.9956340 |
| C | -4.1014890 | -1.7946480 | 0.2616750  |
| H | -2.1634670 | -2.5156970 | 0.9134140  |
| C | -4.0137270 | 0.2376850  | -1.1063480 |
| H | -2.0816250 | 1.0344240  | -1.5075600 |
| C | -4.7853290 | -0.7781180 | -0.4818670 |
| H | -4.5242250 | 0.9981090  | -1.6913290 |
| C | -0.4887450 | -0.7833730 | -0.1375730 |
| C | -0.0015950 | 1.6882140  | -0.0065440 |
| C | 0.4594000  | 2.5912080  | -0.9718190 |
| C | -0.8190570 | 2.1327990  | 1.0393070  |
| C | 0.1039080  | 3.9327610  | -0.8936570 |
| H | 1.0942610  | 2.2380480  | -1.7759720 |
| C | -1.1855800 | 3.4715230  | 1.1146440  |
| H | -1.1651590 | 1.4258670  | 1.7847940  |
| C | -0.7241040 | 4.3813740  | 0.1488770  |
| H | 0.4585570  | 4.6362670  | -1.6387380 |
| H | -1.8212140 | 3.8197400  | 1.9212340  |
| N | 0.3641260  | 0.3121810  | -0.0815780 |
| N | 0.1967960  | -1.9070390 | -0.1152410 |
| C | -6.2011730 | -0.8282660 | -0.5751980 |
| H | -6.7165440 | -0.0566370 | -1.1411530 |
| C | -6.9110620 | -1.8358810 | 0.0380490  |
| H | -7.9938480 | -1.8642820 | -0.0402810 |
| C | -6.2362260 | -2.8417730 | 0.7735660  |
| H | -6.8085070 | -3.6314350 | 1.2513200  |
| C | -4.8647430 | -2.8214660 | 0.8825630  |
| H | -4.3437540 | -3.5919420 | 1.4444900  |
| C | 2.8682200  | 0.6750710  | -0.0078170 |
| C | 3.8335720  | 0.5635150  | -1.0233550 |
| C | 3.0776760  | 1.6113420  | 1.0190000  |
| C | 4.9747210  | 1.3637900  | -1.0102870 |
| H | 3.6824990  | -0.1591000 | -1.8190290 |
| C | 4.2161780  | 2.4162400  | 1.0255590  |
| H | 4.0605410  | -1.4834280 | 1.0519410  |



|   |            |            |            |
|---|------------|------------|------------|
| C | 5.1680930  | 2.2951300  | 0.0117970  |
| H | 5.7109060  | 1.2630330  | -1.8023480 |
| H | 4.3623490  | 3.1337210  | 1.8276040  |
| H | 6.0556130  | 2.9207970  | 0.0195770  |
| C | 2.5493030  | -2.6356190 | 0.0241810  |
| C | 2.2388930  | -3.9045130 | -0.4948900 |
| C | 3.8095140  | -2.4431720 | 0.6148830  |
| C | 3.1677790  | -4.9409020 | -0.4436870 |
| H | 1.2589300  | -4.0604560 | -0.9322820 |
| C | 4.7370480  | -3.4826200 | 0.6627100  |
| C | 4.4235280  | -4.7345290 | 0.1310850  |
| H | 2.9103890  | -5.9132400 | -0.8543310 |
| H | 5.7049290  | -3.3148720 | 1.1267030  |
| H | 5.1479390  | -5.5428730 | 0.1704720  |
| H | 2.3484460  | 1.7017660  | 1.8181170  |
| C | -1.0954690 | 5.7640350  | 0.2277270  |
| N | -1.3964040 | 6.8859110  | 0.2916150  |

## 2-NTPI-4

58

symmetry c1

|   |            |            |            |
|---|------------|------------|------------|
| C | -1.2678630 | 1.0239180  | 0.1555130  |
| C | -0.7066080 | 2.2700930  | -0.0880860 |
| C | 2.3351800  | 0.3619230  | -0.1411050 |
| C | 3.3699880  | 1.1870530  | 0.2696300  |
| C | 2.6485030  | -0.9166030 | -0.6886570 |
| C | 4.7234770  | 0.7809850  | 0.1757560  |
| H | 3.1317580  | 2.1695450  | 0.6642910  |
| C | 3.9532970  | -1.3358000 | -0.7897250 |
| H | 1.8534340  | -1.5569030 | -1.0523060 |
| C | 5.0279510  | -0.5132330 | -0.3588430 |
| H | 4.1776950  | -2.3090950 | -1.2181600 |
| C | 0.9596670  | 0.8817300  | -0.0542380 |
| C | -0.2585140 | -1.2566360 | 0.5054310  |
| C | -0.9910630 | -2.1215410 | -0.3116640 |
| C | 0.4036090  | -1.7469880 | 1.6346980  |
| C | -1.0535790 | -3.4777640 | 0.0073190  |
| H | -1.5007040 | -1.7391080 | -1.1873470 |
| C | 0.3448730  | -3.1071540 | 1.9369010  |
| H | 0.9655850  | -1.0631250 | 2.2613740  |
| C | -0.3834650 | -3.9766780 | 1.1280640  |
| H | 0.8681080  | -3.4873700 | 2.8082710  |
| N | -0.1845200 | 0.1344200  | 0.1882570  |
| N | 0.6582690  | 2.1534220  | -0.2199090 |
| C | 6.3854680  | -0.9200640 | -0.4462570 |
| H | 6.6129210  | -1.9016490 | -0.8539890 |
| C | 7.3979310  | -0.0878110 | -0.0246570 |
| H | 8.4326810  | -0.4095950 | -0.0968030 |
| C | 7.0983950  | 1.1923540  | 0.5041250  |
| H | 7.9066190  | 1.8395290  | 0.8317400  |
| C | 5.7929780  | 1.6161910  | 0.6015270  |
| H | 5.5598430  | 2.5979920  | 1.0047710  |
| C | -2.6689810 | 0.5899610  | 0.3247640  |
| C | -3.6031910 | 0.8336980  | -0.6966690 |

|   |            |            |            |
|---|------------|------------|------------|
| C | -3.1038630 | -0.0586860 | 1.4929660  |
| C | -4.9329630 | 0.4420290  | -0.5519440 |
| H | -3.2770170 | 1.3357290  | -1.6019860 |
| C | -4.4330990 | -0.4557170 | 1.6324260  |
| H | -3.0891090 | 3.1477410  | 0.9896060  |
| C | -5.3515810 | -0.2066550 | 0.6113800  |
| H | -5.6411400 | 0.6383820  | -1.3515300 |
| H | -4.7521150 | -0.9557040 | 2.5422100  |
| H | -6.3867120 | -0.5157540 | 0.7216640  |
| C | -1.3416500 | 3.5965160  | -0.1989520 |
| C | -0.6762870 | 4.6095880  | -0.9110310 |
| C | -2.5715000 | 3.9020490  | 0.4080820  |
| C | -1.2330360 | 5.8807430  | -1.0285440 |
| H | 0.2826670  | 4.3810470  | -1.3628120 |
| C | -3.1263980 | 5.1750040  | 0.2864780  |
| C | -2.4633480 | 6.1693750  | -0.4344330 |
| H | -0.7046730 | 6.6486520  | -1.5867310 |
| H | -4.0767360 | 5.3921950  | 0.7660770  |
| H | -2.8977770 | 7.1606380  | -0.5266600 |
| H | -2.3975890 | -0.2447480 | 2.2959950  |
| H | -0.4285730 | -5.0357350 | 1.3570310  |
| C | -1.8827210 | -4.4127900 | -0.8340050 |
| F | -3.0962500 | -4.6346130 | -0.2798560 |
| F | -1.2871940 | -5.6197520 | -0.9653800 |
| F | -2.0948950 | -3.9258690 | -2.0748360 |

## 2-NTPI-5

56

symmetry c1

|   |            |            |            |
|---|------------|------------|------------|
| C | 1.5339530  | -0.3602360 | 0.0803370  |
| C | 1.2050370  | -1.6989120 | -0.0793740 |
| C | -2.1320210 | -0.3737440 | -0.1903380 |
| C | -3.0020000 | -1.3356650 | 0.2973780  |
| C | -2.6689030 | 0.7871190  | -0.8202370 |
| C | -4.4065360 | -1.1810810 | 0.2006500  |
| H | -2.5921100 | -2.2299430 | 0.7557680  |
| C | -4.0276970 | 0.9622550  | -0.9267620 |
| H | -2.0005950 | 1.5287080  | -1.2422300 |
| C | -4.9374940 | -0.0028940 | -0.4187300 |
| H | -4.4230550 | 1.8468820  | -1.4189690 |
| C | -0.6854280 | -0.6345500 | -0.0958810 |
| C | 0.1316610  | 1.7172690  | 0.3156730  |
| C | 0.7062540  | 2.6468780  | -0.5518330 |
| C | -0.6105530 | 2.1492120  | 1.4206530  |
| C | 0.5340020  | 4.0176270  | -0.3073160 |
| H | 1.2832800  | 2.3118940  | -1.4051440 |
| C | -0.7891700 | 3.5132140  | 1.6500160  |
| H | -1.0449760 | 1.4136700  | 2.0886720  |
| C | -0.2196830 | 4.4528760  | 0.7952330  |
| H | -1.3701680 | 3.8430000  | 2.5049910  |
| N | 0.3071530  | 0.3203950  | 0.0811880  |
| N | -0.1600370 | -1.8380400 | -0.1923880 |
| C | -6.3459520 | 0.1518840  | -0.5097130 |
| H | -6.7452310 | 1.0455940  | -0.9821990 |

|   |            |            |            |
|---|------------|------------|------------|
| C | -7.1931580 | -0.8117860 | -0.0107070 |
| H | -8.2688240 | -0.6827580 | -0.0861710 |
| C | -6.6695590 | -1.9771180 | 0.6024590  |
| H | -7.3491170 | -2.7300000 | 0.9906810  |
| C | -5.3093350 | -2.1572410 | 0.7052940  |
| H | -4.9043610 | -3.0504770 | 1.1732470  |
| C | 2.8340130  | 0.3301210  | 0.2005180  |
| C | 3.7800670  | 0.2228570  | -0.8332880 |
| C | 3.1598410  | 1.0938530  | 1.3341850  |
| C | 5.0156080  | 0.8605600  | -0.7347090 |
| H | 3.5383700  | -0.3671020 | -1.7117290 |
| C | 4.3938590  | 1.7361580  | 1.4274680  |
| H | 3.7202750  | -2.0617530 | 0.9924550  |
| C | 5.3251240  | 1.6217390  | 0.3939810  |
| H | 5.7344360  | 0.7678210  | -1.5433810 |
| H | 4.6298120  | 2.3219710  | 2.3109870  |
| H | 6.2858920  | 2.1222780  | 0.4678760  |
| C | 2.0693630  | -2.8928650 | -0.1263700 |
| C | 1.5913770  | -4.0517070 | -0.7624740 |
| C | 3.3418960  | -2.9316900 | 0.4680660  |
| C | 2.3698750  | -5.2051320 | -0.8187900 |
| H | 0.6015460  | -4.0297110 | -1.2048140 |
| C | 4.1187050  | -4.0875270 | 0.4078620  |
| C | 3.6395500  | -5.2282860 | -0.2380320 |
| H | 1.9839650  | -6.0891530 | -1.3187320 |
| H | 5.0986270  | -4.0983020 | 0.8767790  |
| H | 4.2466170  | -6.1278580 | -0.2827470 |
| H | 2.4452840  | 1.1760960  | 2.1474140  |
| H | -0.3493520 | 5.5149740  | 0.9708030  |
| C | 1.1241850  | 4.9782500  | -1.1949790 |
| N | 1.5983710  | 5.7612930  | -1.9123680 |

## 2-NTPI-1 + PA

symmetry c1

|   |            |            |            |
|---|------------|------------|------------|
| C | -4.7629230 | -2.1946860 | -1.0436750 |
| C | -4.2794170 | -1.5982420 | 0.1310920  |
| C | -5.0586780 | -1.6596460 | 1.2967380  |
| C | -6.2989650 | -2.2964720 | 1.2837740  |
| C | -6.7733850 | -2.8825580 | 0.1090910  |
| C | -6.0020050 | -2.8332930 | -1.0530930 |
| H | -4.1600100 | -2.1589780 | -1.9455040 |
| H | -4.6822290 | -1.2264810 | 2.2179050  |
| H | -6.8906180 | -2.3413750 | 2.1930520  |
| H | -7.7382550 | -3.3804940 | 0.1013060  |
| H | -6.3639030 | -3.2919470 | -1.9681460 |
| C | -2.9550320 | -0.9405660 | 0.1202240  |
| C | -1.6931200 | -1.4727980 | -0.0389890 |
| C | -1.2393900 | -2.8667710 | -0.1511780 |
| C | -0.0927430 | -3.1743030 | -0.9029090 |
| C | -1.9389740 | -3.9043320 | 0.4890210  |
| C | 0.3378970  | -4.4948030 | -1.0127750 |
| H | 0.4768010  | -2.3943540 | -1.3954160 |
| C | -1.5043690 | -5.2216050 | 0.3686210  |
| H | -2.8115590 | -3.6785430 | 1.0915480  |

|   |            |            |             |
|---|------------|------------|-------------|
| C | -0.3659520 | -5.5218610 | -0.3830060  |
| H | 1.2289100  | -4.7076280 | -1.5947120  |
| H | -2.0505090 | -6.0136890 | 0.8722330   |
| H | -0.0276330 | -6.5500830 | -0.4710250  |
| C | -0.8444620 | 2.0769020  | -0.0338480  |
| C | 0.2582930  | 2.2503680  | -0.8576960  |
| C | -1.3179420 | 3.1716800  | 0.7474070   |
| C | 0.9151160  | 3.5014910  | -0.9439760  |
| H | 0.6432410  | 1.4199280  | -1.44005000 |
| C | -0.6954540 | 4.3927050  | 0.6769130   |
| H | -2.1573570 | 3.0351660  | 1.4172260   |
| C | 0.4285070  | 4.6020570  | -0.1668820  |
| H | -1.0547980 | 5.2180590  | 1.2850340   |
| C | -1.4726780 | 0.7548100  | 0.0268100   |
| C | -3.8789860 | 1.4059140  | 0.1454540   |
| C | -4.5554780 | 1.7197500  | 1.3251470   |
| C | -4.2432650 | 1.9896540  | -1.0682410  |
| C | -5.6077670 | 2.6342710  | 1.2861400   |
| H | -4.2492900 | 1.2629830  | 2.2601240   |
| C | -5.2944400 | 2.9057740  | -1.0969580  |
| H | -3.7050600 | 1.7297590  | -1.9736440  |
| C | -5.9770570 | 3.2271170  | 0.0773180   |
| H | -6.1353250 | 2.8844540  | 2.2010000   |
| H | -5.5792610 | 3.3655460  | -2.0378340  |
| H | -6.7955220 | 3.9396160  | 0.0509570   |
| N | -2.7938700 | 0.4567920  | 0.1689890   |
| N | -0.8170290 | -0.4033660 | -0.0932580  |
| C | 2.8848790  | -0.7100720 | -0.1354740  |
| C | 3.9969840  | -1.2393180 | -0.9150080  |
| C | 5.2980480  | -1.2918590 | -0.4644200  |
| C | 5.5902380  | -0.8687990 | 0.8341790   |
| C | 4.5890090  | -0.3808950 | 1.6656340   |
| C | 3.2821180  | -0.3117390 | 1.2094050   |
| H | 6.0842510  | -1.6650810 | -1.1073860  |
| H | 4.8255000  | -0.0526210 | 2.6687130   |
| O | 1.7404070  | -0.5585620 | -0.6352640  |
| H | 0.2437480  | -0.4699040 | -0.1175270  |
| N | 2.3045160  | 0.2062690  | 2.1562900   |
| N | 3.7621610  | -1.7465350 | -2.2672470  |
| N | 6.9558110  | -0.9471520 | 1.3235870   |
| O | 2.7206560  | 0.8199270  | 3.1433640   |
| O | 4.6777810  | -1.6226670 | -3.0860410  |
| O | 7.8167700  | -1.3871840 | 0.5559100   |
| O | 7.1785180  | -0.5686750 | 2.4770170   |
| O | 2.6885680  | -2.2973790 | -2.5167780  |
| O | 1.1033330  | -0.0026460 | 1.9491070   |
| C | 1.0898350  | 5.8539290  | -0.2605400  |
| H | 0.7225370  | 6.6875710  | 0.3317040   |
| C | 2.1821390  | 6.0093500  | -1.0845480  |
| H | 2.6824130  | 6.9710790  | -1.1468520  |
| C | 2.0451880  | 3.6943470  | -1.7849170  |
| H | 2.4131160  | 2.8550890  | -2.3681860  |
| C | 2.6645760  | 4.9209150  | -1.8527250  |
| H | 3.5293870  | 5.0588670  | -2.4942380  |

## 2-NTPI-2 + PA

77

symmetry c1

|   |            |            |            |
|---|------------|------------|------------|
| C | -4.3024180 | -2.7862360 | -1.0340520 |
| C | -3.9100170 | -2.0976440 | 0.1245240  |
| C | -4.7024970 | -2.2000390 | 1.2782980  |
| C | -5.8674450 | -2.9659850 | 1.2690680  |
| C | -6.2516740 | -3.6432780 | 0.1106460  |
| C | -5.4653360 | -3.5546790 | -1.0391740 |
| H | -3.6885920 | -2.7185840 | -1.9266020 |
| H | -4.3941150 | -1.6958100 | 2.1882450  |
| H | -6.4697030 | -3.0404690 | 2.1694210  |
| H | -7.1574340 | -4.2421140 | 0.1059640  |
| H | -5.7567370 | -4.0832120 | -1.9416390 |
| C | -2.6639470 | -1.3028570 | 0.1108780  |
| C | -1.3534110 | -1.6999100 | -0.0516470 |
| C | -0.7541510 | -3.0377920 | -0.1654800 |
| C | 0.4161280  | -3.2209000 | -0.9214080 |
| C | -1.3345980 | -4.1436680 | 0.4793980  |
| C | 0.9866370  | -4.4873370 | -1.0312340 |
| H | 0.8963920  | -2.3846290 | -1.4167950 |
| C | -0.7604400 | -5.4064360 | 0.3591070  |
| H | -2.2238770 | -4.0123260 | 1.0855170  |
| C | 0.4004900  | -5.5833610 | -0.3971740 |
| H | 1.8931090  | -4.6036170 | -1.6165850 |
| H | -1.2153250 | -6.2518880 | 0.8666540  |
| H | 0.8476530  | -6.5691440 | -0.4851080 |
| C | -0.8784210 | 1.9180770  | -0.0329390 |
| C | 0.1998650  | 2.2065590  | -0.8569590 |
| C | -1.4589890 | 2.9554130  | 0.7543000  |
| C | 0.7273270  | 3.5178960  | -0.9366860 |
| H | 0.6659230  | 1.4224510  | -1.4441690 |
| C | -0.9626090 | 4.2332360  | 0.6903630  |
| H | -2.2802160 | 2.7315130  | 1.4230220  |
| C | 0.1336060  | 4.5594980  | -0.1527960 |
| H | -1.4026910 | 5.0149030  | 1.3031800  |
| C | -1.3669140 | 0.5380120  | 0.0235750  |
| C | -3.8278010 | 0.9344160  | 0.1458360  |
| C | -4.5210180 | 1.1992270  | 1.3265600  |
| C | -4.2708840 | 1.4621030  | -1.0667560 |
| C | -5.6619270 | 1.9984620  | 1.2873530  |
| H | -4.1592910 | 0.7980770  | 2.2674740  |
| C | -5.4112000 | 2.2616400  | -1.0901080 |
| H | -3.7222450 | 1.2528140  | -1.9791740 |
| C | -6.1282860 | 2.5398090  | 0.0817520  |
| H | -6.1954010 | 2.2074780  | 2.2102320  |
| H | -5.7487000 | 2.6760810  | -2.0358540 |
| N | -2.6496050 | 0.1033850  | 0.1663810  |
| N | -0.5940560 | -0.5448670 | -0.1027960 |
| C | 3.1195260  | -0.4955020 | -0.1421620 |
| C | 4.2750000  | -0.9138210 | -0.9265290 |
| C | 5.5740570  | -0.8695010 | -0.4694840 |
| C | 5.8250280  | -0.4521470 | 0.8395690  |
| C | 4.7837600  | -0.0646720 | 1.6747960  |
| C | 3.4774580  | -0.0929530 | 1.2126000  |

|   |            |            |            |
|---|------------|------------|------------|
| H | 6.3910500  | -1.1630130 | -1.1153670 |
| H | 4.9887100  | 0.2610540  | 2.6856270  |
| O | 1.9679450  | -0.4318570 | -0.6441240 |
| H | 0.4673650  | -0.5016420 | -0.1260200 |
| N | 2.4571800  | 0.3253270  | 2.1638860  |
| N | 4.0887490  | -1.4080870 | -2.2910290 |
| N | 7.1902190  | -0.4298380 | 1.3354390  |
| O | 2.8187440  | 0.9485550  | 3.1664100  |
| O | 4.9942690  | -1.1899150 | -3.1013570 |
| O | 8.0872070  | -0.7843330 | 0.5646720  |
| O | 7.3768820  | -0.0571900 | 2.4971640  |
| O | 3.0657340  | -2.0403680 | -2.5596000 |
| O | 1.2772130  | 0.0274020  | 1.9443190  |
| C | 0.6659110  | 5.8719260  | -0.2393760 |
| H | 0.2175030  | 6.6609890  | 0.3580870  |
| C | 1.7360020  | 6.1411760  | -1.0631750 |
| H | 2.1371320  | 7.1486300  | -1.1200120 |
| C | 1.8313770  | 3.8282180  | -1.7770810 |
| H | 2.2813730  | 3.0333710  | -2.3650190 |
| C | 2.3243960  | 5.1111570  | -1.8380270 |
| H | 3.1702510  | 5.3388970  | -2.4792520 |
| C | -7.3809790 | 3.3806780  | 0.0407380  |
| H | -8.2564980 | 2.7657270  | -0.2005050 |
| H | -7.5734930 | 3.8598760  | 1.0043810  |
| H | -7.3131380 | 4.1621180  | -0.7214400 |

## 2-NTPI-3 + PA

75

symmetry c1

|   |            |            |            |
|---|------------|------------|------------|
| C | -3.9183060 | -2.8974720 | -1.4336670 |
| C | -3.2666750 | -2.6490180 | -0.2167370 |
| C | -3.6236720 | -3.4052680 | 0.9108480  |
| C | -4.6106600 | -4.3869000 | 0.8229150  |
| C | -5.2548140 | -4.6232220 | -0.3927850 |
| C | -4.9063790 | -3.8781750 | -1.5202540 |
| H | -3.6408580 | -2.3245220 | -2.3131260 |
| H | -3.1158080 | -3.2258060 | 1.8544270  |
| H | -4.8740980 | -4.9676240 | 1.7018150  |
| H | -6.0225890 | -5.3879480 | -0.4618890 |
| H | -5.4007400 | -4.0624900 | -2.4692350 |
| C | -2.2148330 | -1.6082630 | -0.1307090 |
| C | -0.8506680 | -1.6605400 | -0.3343630 |
| C | 0.0118560  | -2.7970610 | -0.7018640 |
| C | 1.0987970  | -2.5807470 | -1.5679040 |
| C | -0.2154050 | -4.0953370 | -0.2194280 |
| C | 1.9322250  | -3.6343110 | -1.9381130 |
| H | 1.2773370  | -1.5842980 | -1.9594380 |
| C | 0.6173790  | -5.1471640 | -0.5968730 |
| H | -1.0358970 | -4.2801750 | 0.4638860  |
| C | 1.6940900  | -4.9224270 | -1.4555980 |
| H | 2.7642110  | -3.4496450 | -2.6114750 |
| H | 0.4303920  | -6.1436450 | -0.2079390 |
| H | 2.3438240  | -5.7431590 | -1.7441030 |
| C | -1.1664700 | 1.8994520  | 0.2228810  |

|   |            |            |            |
|---|------------|------------|------------|
| C | -0.2200480 | 2.5693290  | -0.5363950 |
| C | -1.9210080 | 2.6234120  | 1.1923220  |
| C | 0.0150790  | 3.9556700  | -0.3652600 |
| H | 0.3690460  | 2.0296600  | -1.2689600 |
| C | -1.7243490 | 3.9719140  | 1.3637580  |
| H | -2.6406370 | 2.1030110  | 1.8141310  |
| C | -0.7608220 | 4.6808940  | 0.5962120  |
| H | -2.3010960 | 4.5125350  | 2.1093570  |
| C | -1.3250610 | 0.4489460  | 0.0339340  |
| C | -3.8260480 | 0.2977310  | 0.1821790  |
| C | -4.6681200 | -0.0544010 | 1.2411960  |
| C | -4.2664290 | 1.1789780  | -0.8105420 |
| C | -5.9529070 | 0.4734580  | 1.3083430  |
| H | -4.3144100 | -0.7338770 | 2.0072630  |
| C | -5.5462280 | 1.7169160  | -0.7410190 |
| H | -3.6043120 | 1.4407090  | -1.6280870 |
| C | -6.3986030 | 1.3642490  | 0.3183050  |
| H | -6.6120230 | 0.2054850  | 2.1264920  |
| H | -5.8932170 | 2.4030200  | -1.5055190 |
| N | -2.5083810 | -0.2539870 | 0.1006220  |
| N | -0.3277890 | -0.3870840 | -0.2166490 |
| C | 3.2560150  | 0.1065800  | 0.0492930  |
| C | 4.3646050  | 0.8010710  | -0.5342020 |
| C | 5.6834470  | 0.4976360  | -0.2575540 |
| C | 5.9631840  | -0.5678800 | 0.5945000  |
| C | 4.9426840  | -1.2846970 | 1.2006700  |
| C | 3.6196490  | -0.9390070 | 0.9551320  |
| H | 6.4837650  | 1.0738420  | -0.7027790 |
| H | 5.1658610  | -2.0990190 | 1.8768240  |
| O | 2.0622910  | 0.4966750  | -0.2767220 |
| H | 1.1672510  | -0.0140230 | -0.0597480 |
| N | 2.6112100  | -1.6700010 | 1.7270090  |
| N | 4.1345670  | 1.9112110  | -1.4750830 |
| N | 7.3554530  | -0.9236490 | 0.8688270  |
| O | 2.9409880  | -2.7407630 | 2.2317010  |
| O | 4.9295500  | 2.8495140  | -1.4230710 |
| O | 8.2298480  | -0.2612190 | 0.3102260  |
| O | 7.5623380  | -1.8620300 | 1.6376220  |
| O | 3.1990890  | 1.8260840  | -2.2669200 |
| O | 1.5026430  | -1.1484840 | 1.8566200  |
| C | -0.5296420 | 6.0721490  | 0.7557360  |
| H | -1.1193020 | 6.6225150  | 1.4840340  |
| C | 0.4294860  | 6.7135580  | 0.0041040  |
| H | 0.5997440  | 7.7780380  | 0.1355350  |
| C | 1.0041990  | 4.6440980  | -1.1207340 |
| H | 1.6089550  | 4.0833570  | -1.8284740 |
| C | 1.2054470  | 5.9932080  | -0.9376910 |
| H | 1.9665420  | 6.5110920  | -1.5132810 |
| C | -7.7218780 | 1.9126750  | 0.3892890  |
| N | -8.7951480 | 2.3570160  | 0.4474320  |

## 2-NTPI-4 + PA

77

symmetry c1

|   |            |            |            |
|---|------------|------------|------------|
| C | -2.5346220 | -3.7915090 | -1.1227590 |
| C | -2.1836350 | -3.1698430 | 0.0860950  |
| C | -2.5595060 | -3.7788040 | 1.2940590  |
| C | -3.2779110 | -4.9739800 | 1.2920530  |
| C | -3.6254860 | -5.5805280 | 0.0839520  |
| C | -3.2489460 | -4.9887120 | -1.1227730 |
| H | -2.2398110 | -3.3314360 | -2.0605550 |
| H | -2.2667610 | -3.3263190 | 2.2361320  |
| H | -3.5580110 | -5.4354630 | 2.2342660  |
| H | -4.1827580 | -6.5124870 | 0.0832960  |
| H | -3.5126190 | -5.4577450 | -2.0658610 |
| C | -1.4068600 | -1.9119670 | 0.0605790  |
| C | -0.1240910 | -1.6488780 | -0.3802940 |
| C | 0.9095480  | -2.5743610 | -0.8776540 |
| C | 1.8169110  | -2.1457500 | -1.8622380 |
| C | 1.0199750  | -3.8841330 | -0.3809680 |
| C | 2.8059360  | -3.0063720 | -2.3349610 |
| H | 1.7547540  | -1.1382230 | -2.2572160 |
| C | 2.0056420  | -4.7427320 | -0.8632780 |
| H | 0.3424160  | -4.2248550 | 0.3940530  |
| C | 2.9025230  | -4.3083500 | -1.8412810 |
| H | 3.4981220  | -2.6522580 | -3.0929490 |
| H | 2.0796870  | -5.7503590 | -0.4648940 |
| H | 3.6727000  | -4.9783690 | -2.2118400 |
| C | -1.1376590 | 1.7412290  | 0.3646530  |
| C | -0.5243670 | 2.5910580  | -0.5423100 |
| C | -1.8535040 | 2.2972710  | 1.4641410  |
| C | -0.6031270 | 3.9983370  | -0.4032340 |
| H | 0.0298030  | 2.1785040  | -1.3791360 |
| C | -1.9487140 | 3.6583890  | 1.6179270  |
| H | -2.3059490 | 1.6422780  | 2.1984540  |
| C | -1.3372550 | 4.5498780  | 0.6962520  |
| H | -2.4893170 | 4.0707940  | 2.4654640  |
| C | -0.9897200 | 0.2912410  | 0.1763630  |
| C | -3.3207330 | -0.4339570 | 0.7599640  |
| C | -3.7789020 | -0.6994210 | 2.0515970  |
| C | -4.1919200 | 0.0460680  | -0.2179980 |
| C | -5.1210210 | -0.4856620 | 2.3653350  |
| H | -3.0837690 | -1.0583060 | 2.8025700  |
| C | -5.5311510 | 0.2615110  | 0.1069520  |
| H | -3.8285860 | 0.2432460  | -1.2195500 |
| C | -5.9994760 | -0.0067340 | 1.3958980  |
| H | -5.4803580 | -0.6935530 | 3.3677720  |
| N | -1.9442650 | -0.6667290 | 0.4222920  |
| N | 0.1073830  | -0.2893540 | -0.2930390 |
| C | 3.4788800  | 0.5648870  | -0.1465960 |
| C | 4.6670850  | 0.7338030  | -0.9230840 |
| C | 5.9390490  | 0.5097130  | -0.4335160 |
| C | 6.0819660  | 0.0278910  | 0.8657470  |
| C | 4.9749290  | -0.1855730 | 1.6742090  |
| C | 3.7065010  | 0.1034920  | 1.1879190  |
| H | 6.8068140  | 0.6867120  | -1.0552900 |
| H | 5.0930180  | -0.553120  | 2.6846910  |
| O | 2.3346540  | 0.8583480  | -0.6885350 |
| H | 1.4259850  | 0.3852470  | -0.3710900 |



|   |            |            |            |
|---|------------|------------|------------|
| N | 2.6078160  | -0.0305210 | 2.1507910  |
| N | 4.5754660  | 1.1440950  | -2.3346050 |
| N | 7.4193170  | -0.2493280 | 1.3873770  |
| O | 2.7650310  | -0.8111010 | 3.0891020  |
| O | 5.4300710  | 1.9334330  | -2.7363490 |
| O | 8.3741720  | -0.0470860 | 0.6367000  |
| O | 7.5055980  | -0.6676760 | 2.5418970  |
| O | 3.6934030  | 0.6472890  | -3.0292480 |
| O | 1.6113400  | 0.6726930  | 1.9867160  |
| C | -1.4200430 | 5.9606530  | 0.8289860  |
| H | -1.9762650 | 6.3769330  | 1.6646080  |
| C | -0.8050260 | 6.7888210  | -0.0828670 |
| H | -0.8740620 | 7.8667690  | 0.0287990  |
| C | 0.0203330  | 4.8806970  | -1.3273730 |
| H | 0.5790660  | 4.4592340  | -2.1584080 |
| C | -0.0779990 | 6.2440360  | -1.1701810 |
| H | 0.4037680  | 6.9093980  | -1.8801790 |
| H | -7.0455050 | 0.1537280  | 1.6327520  |
| C | -6.4779500 | 0.8288260  | -0.9199110 |
| F | -6.6356760 | 2.1616260  | -0.7616760 |
| F | -7.7050420 | 0.2729410  | -0.8173730 |
| F | -6.0386680 | 0.6245540  | -2.1792040 |

## 2-NTPI-5 +PA

75

symmetry c1

|   |            |            |            |
|---|------------|------------|------------|
| C | 3.8427490  | -3.0567200 | 1.2954410  |
| C | 3.3313950  | -2.6596100 | 0.0507580  |
| C | 3.8156610  | -3.2819470 | -1.1109750 |
| C | 4.7946880  | -4.2717660 | -1.0295580 |
| C | 5.2997700  | -4.6552580 | 0.2140880  |
| C | 4.8201710  | -4.0483940 | 1.3757000  |
| H | 3.4658650  | -2.5873450 | 2.1987860  |
| H | 3.4057490  | -3.0018440 | -2.0770440 |
| H | 5.1566600  | -4.7483520 | -1.9356680 |
| H | 6.0601040  | -5.4278940 | 0.2776570  |
| H | 5.2060140  | -4.3466920 | 2.3457750  |
| C | 2.2827270  | -1.6167240 | -0.0197970 |
| C | 0.9337770  | -1.6596620 | 0.2677730  |
| C | 0.0987840  | -2.7896510 | 0.7089520  |
| C | -0.9553340 | -2.5594240 | 1.6106220  |
| C | 0.3248620  | -4.0989520 | 0.2558850  |
| C | -1.7597770 | -3.6115370 | 2.0442070  |
| H | -1.1316220 | -1.5536040 | 1.9786800  |
| C | -0.4789070 | -5.1485220 | 0.6964300  |
| H | 1.1206620  | -4.2923740 | -0.4544730 |
| C | -1.5238480 | -4.9104810 | 1.5905270  |
| H | -2.5669420 | -3.4169890 | 2.7444350  |
| H | -0.2949250 | -6.1540040 | 0.3298600  |
| H | -2.1510730 | -5.7298030 | 1.9286070  |
| C | 1.2123400  | 1.8759040  | -0.4418480 |
| C | 0.2999580  | 2.5636540  | 0.3432840  |
| C | 1.9239170  | 2.5790070  | -1.4580070 |
| C | 0.0568250  | 3.9457180  | 0.1523310  |

|   |            |            |            |
|---|------------|------------|------------|
| H | -0.2546810 | 2.0418650  | 1.1144430  |
| C | 1.7200950  | 3.9237960  | -1.6491480 |
| H | 2.6159110  | 2.0461010  | -2.0997330 |
| C | 0.7903400  | 4.6498950  | -0.8567120 |
| H | 2.2645840  | 4.4481890  | -2.4298030 |
| C | 1.3801650  | 0.4311240  | -0.2235910 |
| C | 3.8713530  | 0.2745270  | -0.4912940 |
| C | 4.6148270  | 0.0088560  | -1.6443530 |
| C | 4.4014440  | 1.0660640  | 0.5261320  |
| C | 5.8978210  | 0.5396970  | -1.7797570 |
| H | 4.1833230  | -0.6008850 | -2.4295780 |
| C | 5.6887560  | 1.6042300  | 0.3802870  |
| H | 3.8217050  | 1.2670680  | 1.4194110  |
| C | 6.4397400  | 1.3374860  | -0.7761580 |
| H | 6.4740950  | 0.3332120  | -2.6754640 |
| N | 2.5569950  | -0.2762970 | -0.3368250 |
| N | 0.4015620  | -0.3933910 | 0.1247330  |
| C | -3.1850780 | 0.0756820  | 0.0025710  |
| C | -4.2734260 | 0.7865000  | 0.6057660  |
| C | -5.6009600 | 0.4753040  | 0.3854400  |
| C | -5.9105520 | -0.6137860 | -0.4255630 |
| C | -4.9117950 | -1.3473030 | -1.0479090 |
| C | -3.5811770 | -0.9947900 | -0.8604780 |
| H | -6.3851520 | 1.0641990  | 0.8425470  |
| H | -5.1585210 | -2.1804880 | -1.6921430 |
| O | -1.9812690 | 0.4717860  | 0.2758040  |
| H | -1.0837060 | -0.0365500 | 0.0363600  |
| N | -2.6014560 | -1.7471160 | -1.6483000 |
| N | -4.0116210 | 1.9244230  | 1.5041990  |
| N | -7.3112180 | -0.9766900 | -0.6394360 |
| O | -2.9455720 | -2.8360000 | -2.1025230 |
| O | -4.8128280 | 2.8578690  | 1.4565710  |
| O | -8.1656940 | -0.2983450 | -0.0690530 |
| O | -7.5451950 | -1.9366030 | -1.3733060 |
| O | -3.0447530 | 1.8666740  | 2.2598490  |
| O | -1.5025110 | -1.2252330 | -1.8423070 |
| C | 0.5521900  | 6.0375020  | -1.0357880 |
| H | 1.1103380  | 6.5720980  | -1.7998010 |
| C | -0.3741970 | 6.6951520  | -0.2576500 |
| H | -0.5500210 | 7.7567880  | -0.4039090 |
| C | -0.8989180 | 4.6506340  | 0.9351000  |
| H | -1.4712340 | 4.1059530  | 1.6812970  |
| C | -1.1086140 | 5.9954790  | 0.7318350  |
| H | -1.8438620 | 6.5260940  | 1.3289840  |
| H | 7.4350110  | 1.7558010  | -0.8767920 |
| C | 6.2418480  | 2.4209640  | 1.4222430  |
| N | 6.6961050  | 3.0808400  | 2.2651390  |

## References:

1. G. He, H. Peng, T. Liu, M. Yang, Y. Zhang and Y. Fang, *J. Mater. Chem.*, 2009, **19**, 7347-7353.
2. D. Li, J. Liu, R. T. K. Kwok, Z. Liang, B. Z. Tang and J. Yu, *Chem. Commun.*, 2012, **48**, 7167-7169.
3. Y. P. Zhuang, J. Y. Yao, Z. Y. Zhuang, C. J. Ni, H. M. Yao, D. L. Su, J. Zhou and Z. J. Zhao, *Dyes Pigm.*, 2020, **174**, 108041.
4. Y. J. Li, Y. N. Han, M. H. Chen, Y. Q. Feng and B. Zhang, *RSC Adv.*, 2019, **9**, 30937.
5. P. Lu, J. W. Y. Lam, J. Liu, C. K. W. Jim, W. Yuan, N. Xie, Y. Zhong, Q. Hu, K. S. Wong, K. K. L. Cheuk and B. Z. Tang, *Macromol. Rapid Commun.*, 2010, **31**, 834-839.
6. D. B. Wu, W. J. Gong, H. M. Yao, L. M. Huang, Z. H. Lin and Q. D. Ling, *Dyes Pigm.*, 2020, **172**, 107829.
7. S. S. Zhang, H. C. Zhu, J. Y. Huang, L. Kong, Y. P. Tian and J. X. Yang, *Chemistry Select*, 2019, **4**, 7380.
8. X. Lu, G. C. Zhang, D. D. Li, X. H. Tian, W. Ma, S. L. Li, Q. Zhang, H. P. Zhou, J. Y. Wu and Y. P., *Dyes Pigm.*, 2019, **170**, 107641.
9. Z. J. Luo, B. Liu, S. F. Si, Y. J. Lin, C. S. Luo, C. J. Pan, C. Zhao and L. Wang, *Dyes Pigm.*, 2017, **143**, 463.
10. M. Gupta and H. Lee, *ACS Appl. Mater. Interfaces*, 2018, **10**, 41717.
11. X. L. Yu, J. Q. Wan, S. Chen, M. Li, J. K. Gao, L. Yang, H. S. Wang, D. G. Chen, Z. Q. Pan and J. B. Li, *Talanta*, 2017, **174**, 462.
12. S. Kasthuri, S. Kumar, S. Raviteja, B. Ramakrishna, S. Maji, N. Veeraiah and N. Venkatramaiah, *Appl. Surf. Sci.*, 2019, **481**, 1018.
13. Z.-H. Fu, Y. W. Wang and Y. Peng, *Chem. Commun.*, 2017, **53**, 10524.

14. Si-Hong Chen,<sup>a</sup> Kai Jiang, Jian-Yun Lin, Kai Yang, Xi-Ying Cao, Xiao-Yan Luo and Zhao-Yang Wang, *J. Mater. Chem. C.*, 2020, **8**, 8257-8267
15. Jin-Feng Xiong, Jian-Xiao Li, Guang-Zhen Mo, Jing-Pei Huo, Jin-Yan Liu, Xiao-Yun Chen, and Zhao-Yang Wang, *J. Org. Chem.* 2014, **79**, 11619–11630.
16. H.-T. Feng and Y.-S. Zheng, *Chem. Eur. J.*, 2013, **20**, 195-201.
17. T. Liu, L. Ding, G. He, Y. Yang, W. Wang and Y. Fang, *ACS Appl. Mater. Interfaces*, 2011, **3**, 1245-1253.
18. A. B. Kajjam, K. Singh, R. V. Varun Tej and S. Vaidyanathan, *Mater. Adv.*, 2021, **2**, 5236-5247
